# Supplementary material for: Solid-phase synthesis of a library of linear oligoester ion-channels
Source: Royal Society of Chemistry journal article supplement (doi:10.1039/b816648j), 2009-01-01

# Solid-phase synthesis of a library of linear oligoester ion-channels

*Thomas Murray Fyles\**, *Horace Luong*

Department of Chemistry, University of Victoria, Victoria, British Columbia, Canada, V8W 3P6

tmf@uvic.ca

## Table of Contents

|                                                                    |     |
|--------------------------------------------------------------------|-----|
| General Experimental                                               | S3  |
| <sup>1</sup> H NMR of <b>HO<sub>2</sub>C-Hex-OThp</b>              | S4  |
| <sup>13</sup> C NMR of <b>HO<sub>2</sub>C-Hex-OThp</b>             | S5  |
| <sup>1</sup> H NMR of <b>HO<sub>2</sub>C-Lau-OTBDMS</b>            | S6  |
| <sup>13</sup> C NMR of <b>HO<sub>2</sub>C-Lau-OTBDMS</b>           | S7  |
| <sup>1</sup> H NMR of <b>HO<sub>2</sub>C-Ole-OTBDMS</b>            | S8  |
| <sup>13</sup> C NMR of <b>HO<sub>2</sub>C-Lau-OTBDMS</b>           | S9  |
| <sup>1</sup> H NMR of <b>HO<sub>2</sub>C-G(10)-OTBDMS</b>          | S10 |
| <sup>13</sup> C NMR of <b>HO<sub>2</sub>C-G(10)-OTBDMS</b>         | S11 |
| <sup>1</sup> H NMR of <b>HO<sub>2</sub>C-G(14)-OTBDMS</b>          | S12 |
| <sup>13</sup> C NMR of <b>HO<sub>2</sub>C-G(14)-OTBDMS</b>         | S13 |
| <sup>1</sup> H NMR of <b>HO<sub>2</sub>C-G(16)-OTBDMS</b>          | S14 |
| <sup>13</sup> C NMR of <b>HO<sub>2</sub>C-G(16)-OTBDMS</b>         | S15 |
| <sup>1</sup> H NMR of <b>HO<sub>2</sub>C-Oct-Dod-Oct-G(10)-OH</b>  | S16 |
| <sup>13</sup> C NMR of <b>HO<sub>2</sub>C-Oct-Dod-Oct-G(10)-OH</b> | S17 |
| <sup>1</sup> H NMR of <b>HO<sub>2</sub>C-Oct-Dod-Oct-G(14)-OH</b>  | S18 |
| <sup>13</sup> C NMR of <b>HO<sub>2</sub>C-Oct-Dod-Oct-G(14)-OH</b> | S19 |
| <sup>1</sup> H NMR of <b>HO<sub>2</sub>C-Oct-Dod-Oct-G(16)-OH</b>  | S20 |

|                                                                        |     |
|------------------------------------------------------------------------|-----|
| <sup>13</sup> C NMR of <b>HO<sub>2</sub>C-Oct-Dod-Oct-G(16)-OH</b>     | S21 |
| <sup>1</sup> H NMR of <b>HO<sub>2</sub>C-Oct-Oct-Dod-G(12)-OH</b>      | S22 |
| <sup>13</sup> C NMR of <b>HO<sub>2</sub>C-Oct-Oct-Dod-G(12)-OH</b>     | S23 |
| <sup>1</sup> H NMR of <b>HO<sub>2</sub>C-Dod-Oct-Oct-G(12)-OH</b>      | S24 |
| <sup>13</sup> C NMR of <b>HO<sub>2</sub>C-Dod-Oct-Oct-G(12)-OH</b>     | S25 |
| <sup>1</sup> H NMR of <b>HO<sub>2</sub>C-Oct-Oct-Oct-G(12)-OH</b>      | S26 |
| <sup>13</sup> C NMR of <b>HO<sub>2</sub>C-Oct-Oct-Oct-G(12)-OH</b>     | S27 |
| <sup>1</sup> H NMR of <b>HO<sub>2</sub>C-Dod-Dod-Dod-G(12)-OH</b>      | S28 |
| <sup>13</sup> C NMR of <b>HO<sub>2</sub>C-Dod-Dod-Dod-G(12)-OH</b>     | S29 |
| <sup>1</sup> H NMR of <b>HO<sub>2</sub>C-Dod-Dod-Oct-G(12)-OH</b>      | S30 |
| <sup>13</sup> C NMR of <b>HO<sub>2</sub>C-Dod-Dod-Oct-G(12)-OH</b>     | S31 |
| <sup>1</sup> H NMR of <b>HO<sub>2</sub>C-Oct-Dod-Dod-G(12)-OH</b>      | S32 |
| <sup>13</sup> C NMR of <b>HO<sub>2</sub>C-Oct-Dod-Dod-G(12)-OH</b>     | S33 |
| <sup>1</sup> H NMR of <b>HO<sub>2</sub>C-Oct-Dod-Oct-Lau-OH</b>        | S34 |
| <sup>13</sup> C NMR of <b>HO<sub>2</sub>C-Oct-Dod-Oct-Lau-OH</b>       | S35 |
| <sup>1</sup> H NMR of <b>HO<sub>2</sub>C-Oct-Dod-Oct-Oleate</b>        | S36 |
| <sup>13</sup> C NMR of <b>HO<sub>2</sub>C-Oct-Dod-Oct-Oleate</b>       | S37 |
| <sup>1</sup> H NMR of <b>HO<sub>2</sub>C-Hex-Oct-Hex-Oct-G(12)-OH</b>  | S38 |
| <sup>13</sup> C NMR of <b>HO<sub>2</sub>C-Hex-Oct-Hex-Oct-G(12)-OH</b> | S39 |
| <sup>1</sup> H NMR of <b>HO<sub>2</sub>C-Lau-Oct-Dod-Oct-G(12)-OH</b>  | S40 |
| <sup>13</sup> C NMR of <b>HO<sub>2</sub>C-Lau-Oct-Dod-Oct-G(12)-OH</b> | S41 |
| <sup>1</sup> H NMR of <b>HO<sub>2</sub>C-Ole-Oct-Dod-Oct-G(12)-OH</b>  | S42 |
| <sup>13</sup> C NMR of <b>HO<sub>2</sub>C-Ole-Oct-Dod-Oct-G(12)-OH</b> | S43 |

**General Methods.** Unless specified, reagents were purchased from Aldrich and were used without further purification. THF used for solid-phase reactions was dried over sodium and benzophenone and distilled. Wang Resin was purchased from Anaspec Incorporated (loading capacity 0.75 meq/g, 100-200 mesh). New resin is swollen and washed in THF before usage. Solid-phase reactions were carried out in 25 mL solid-phase reaction vessels and were agitated by a mechanical shaker. Column chromatography was performed on silica gel (grade 60, 63-200 mesh). Size exclusion separation of the oligoester compounds was performed on a Lipophilic Sephadex LH-20 column. All amounts for solid-phase reactions are for 200 mg of resin. Yields for the solid-phase reactions are reported relative to their starting resin loading capacity.

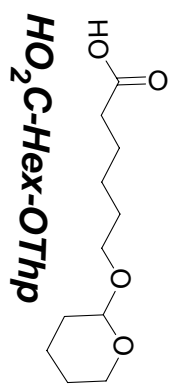

<sup>1</sup>H NMR (CDCl<sub>3</sub>)  
300 MHz

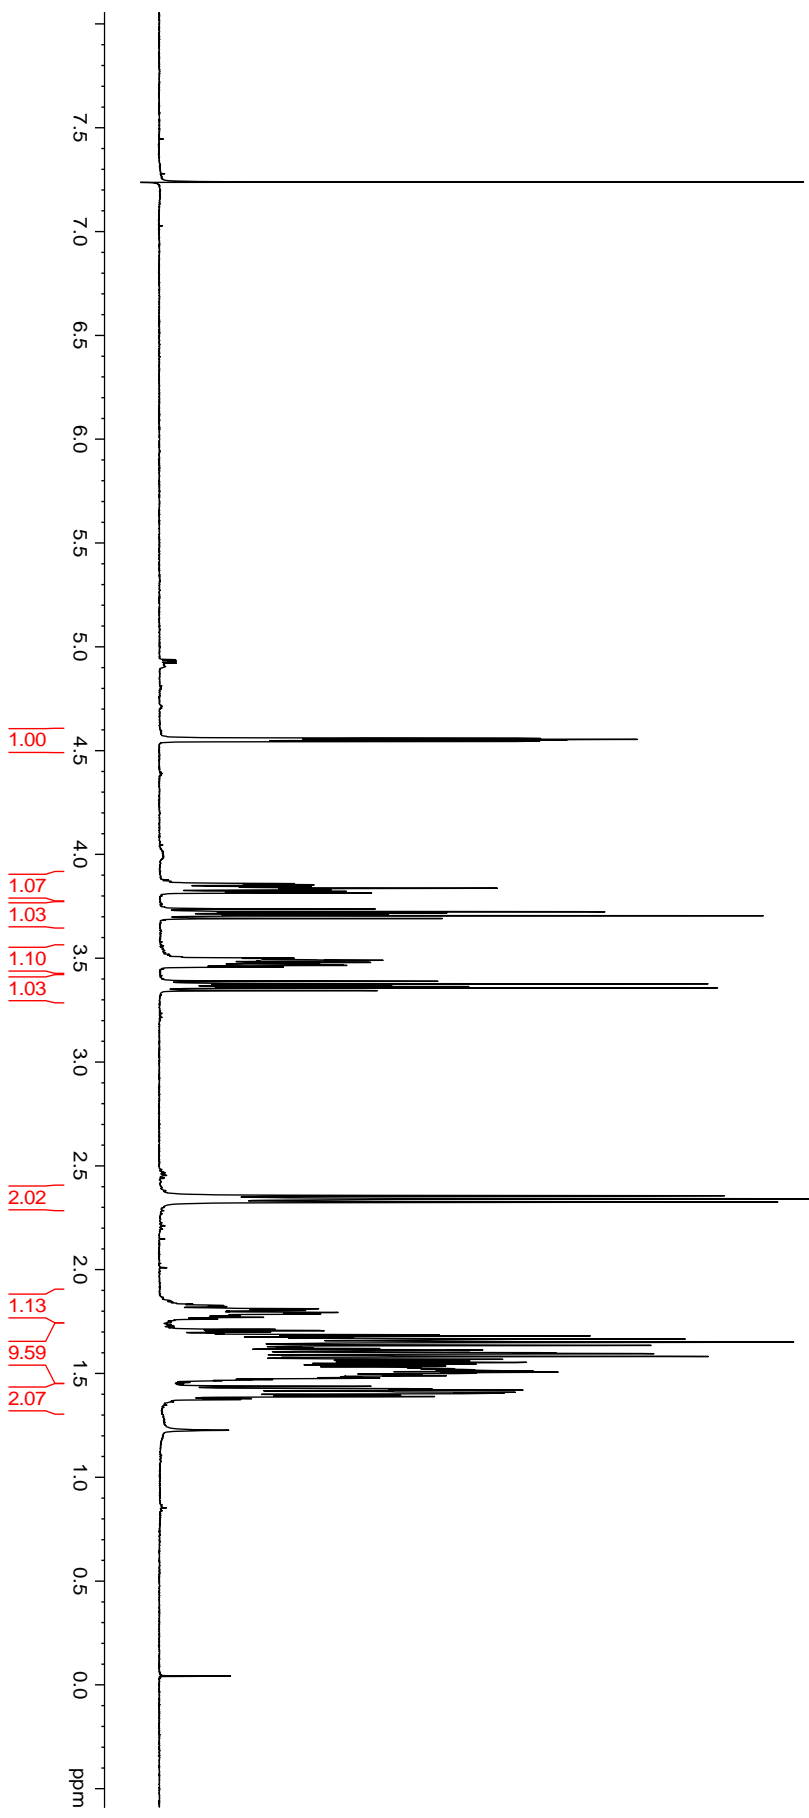

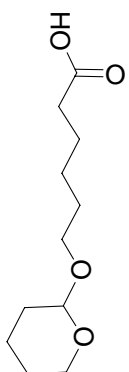

***HO<sub>2</sub>C-Hex-OThp***

<sup>13</sup>C NMR (CDCl<sub>3</sub>)  
75 MHz

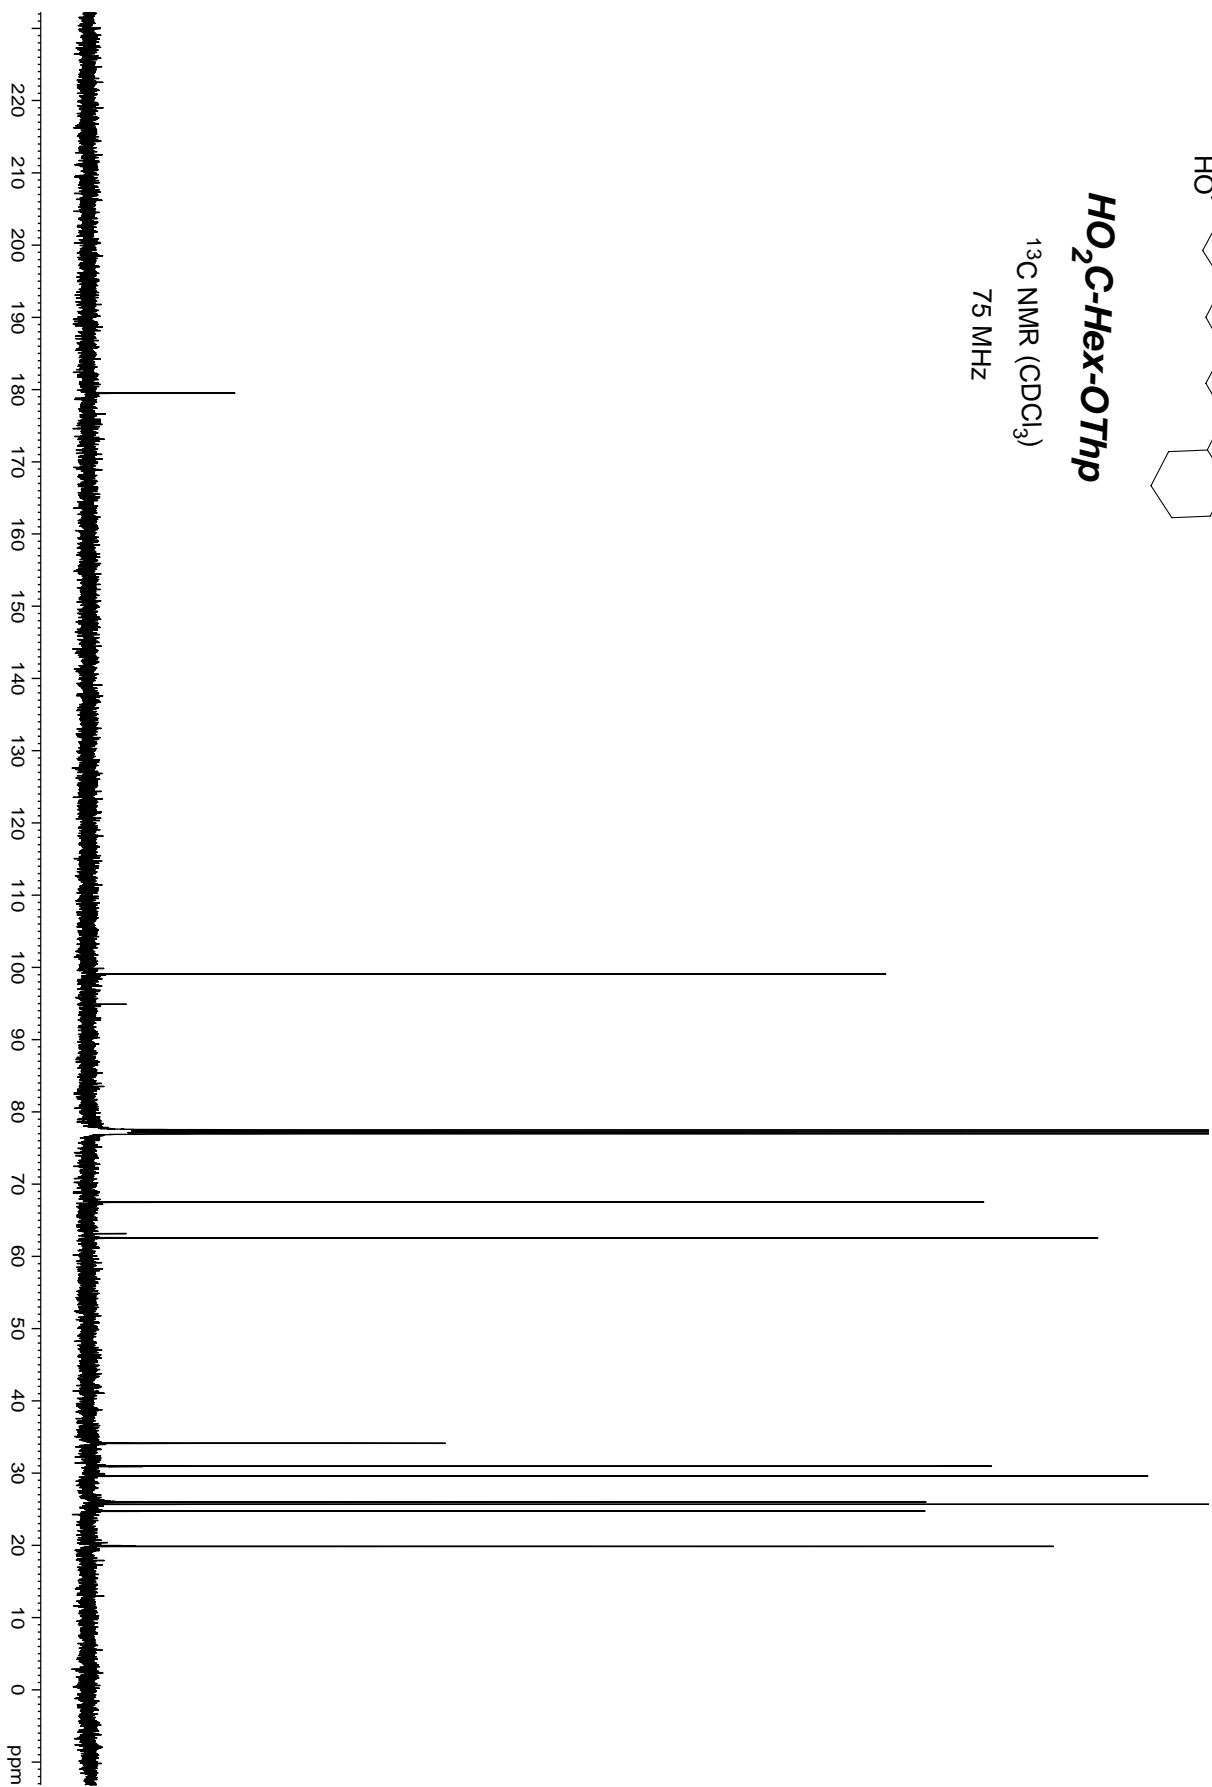

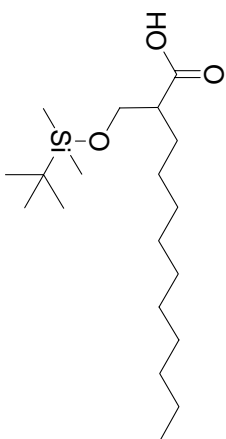

### ***HO<sub>2</sub>C-Lau-OTBDMS***

<sup>1</sup>H NMR (CDCl<sub>3</sub>)

500 MHz

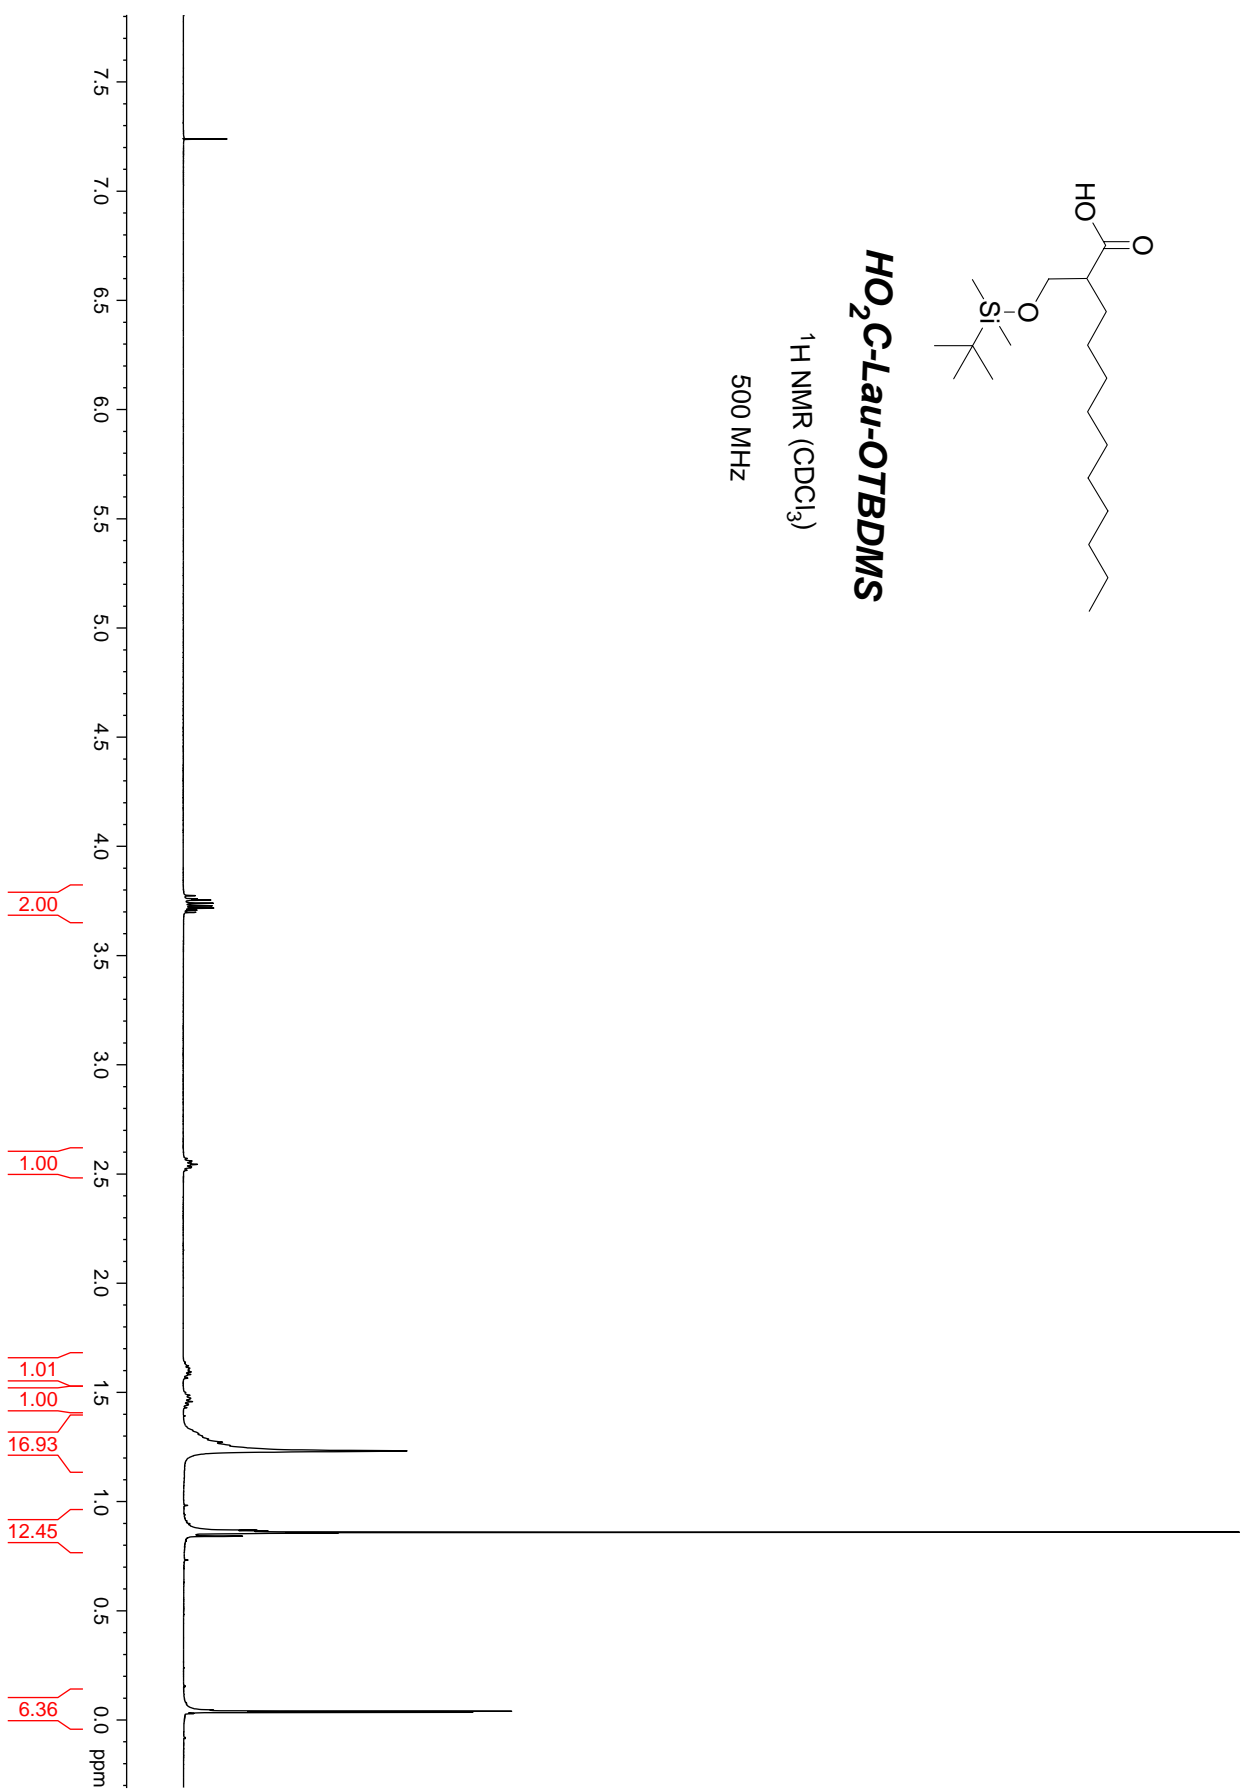

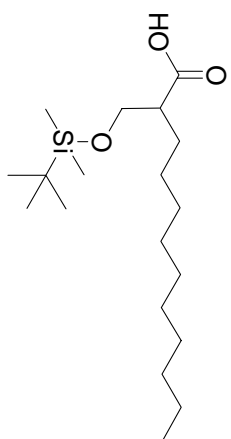

### ***HO<sub>2</sub>C-Lau-OTBDMS***

<sup>13</sup>C NMR (CDCl<sub>3</sub>)

125 MHz

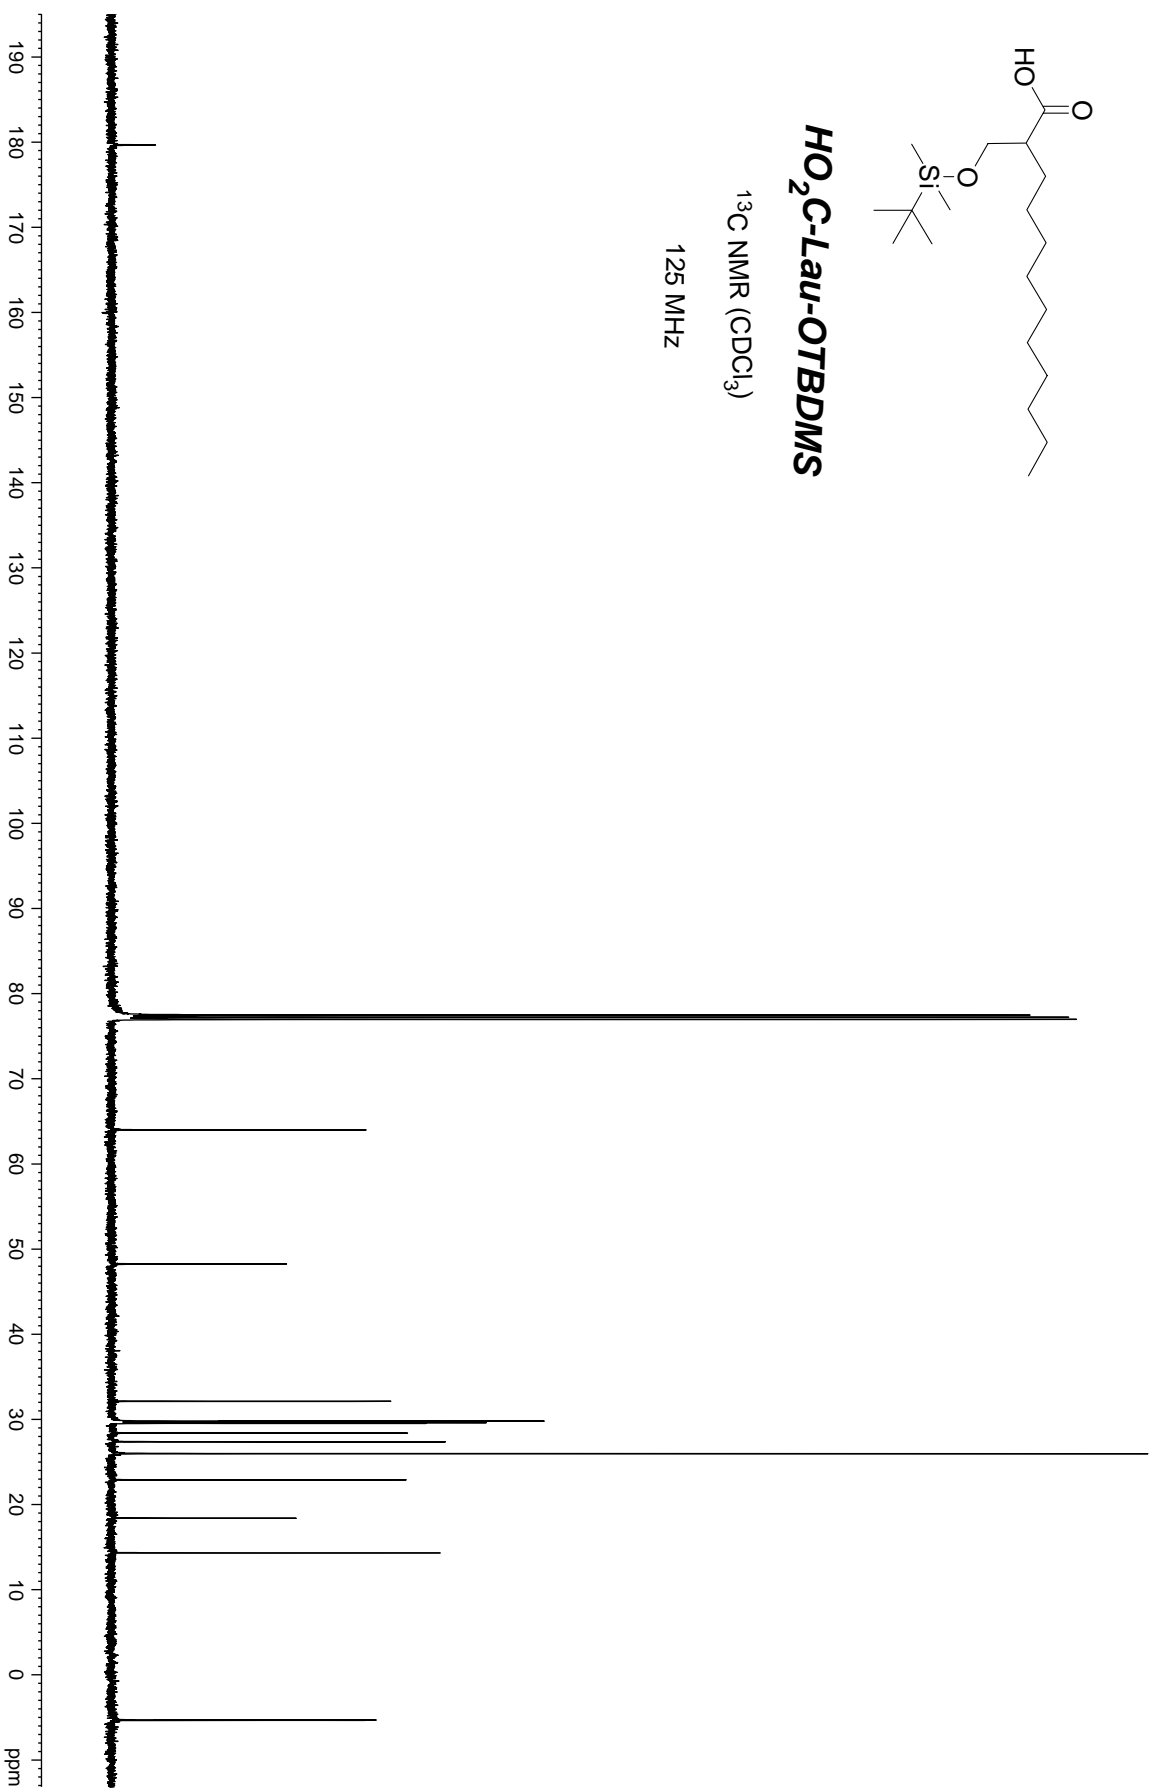

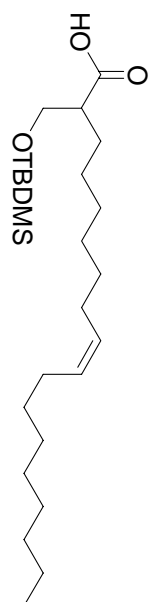

### ***HO<sub>2</sub>C-Ole-OTBDMS***

<sup>1</sup>H NMR (CDCl<sub>3</sub>)

500 MHz

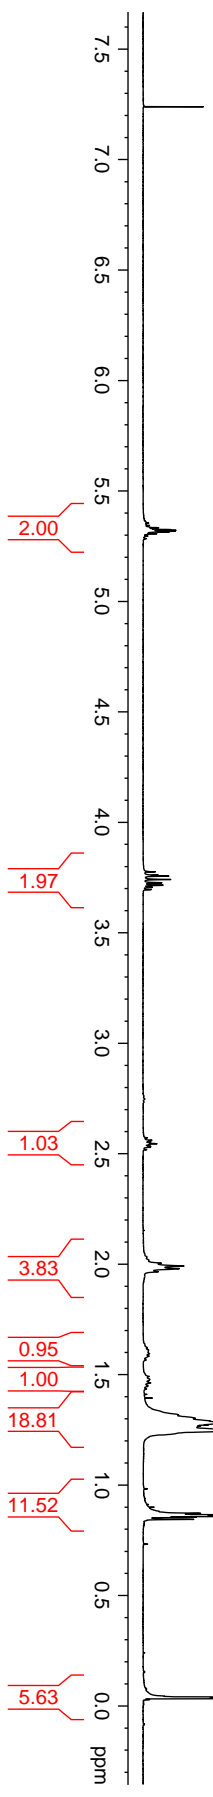



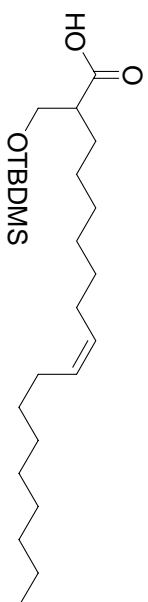

***HO<sub>2</sub>C-Ole-OTBDMS***

<sup>13</sup>C NMR (CDCl<sub>3</sub>)

125 MHz

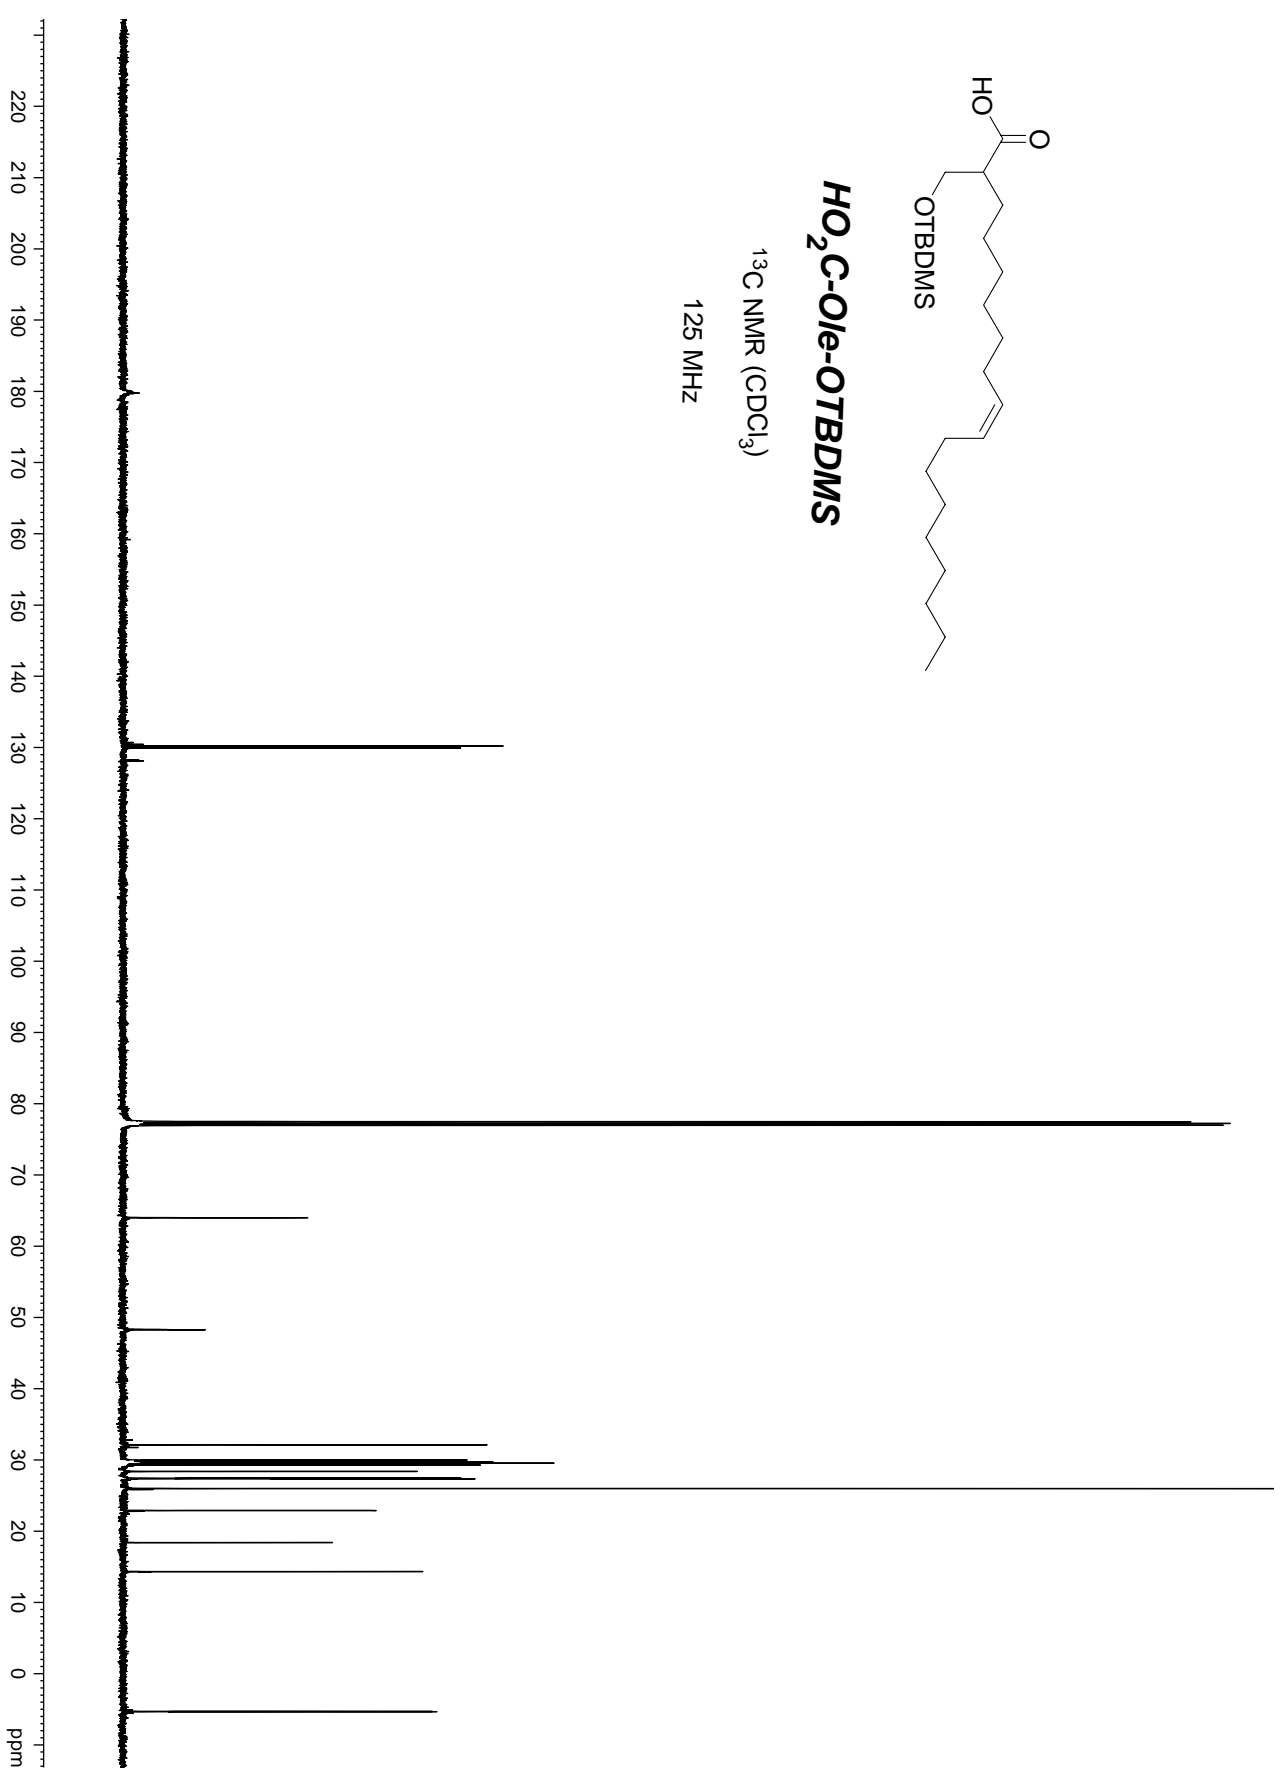

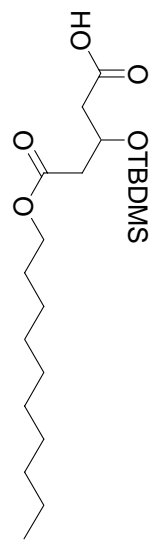

**HO<sub>2</sub>C-G(10)-OTBDMS**

<sup>1</sup>H NMR (CDCl<sub>3</sub>)  
500 MHz

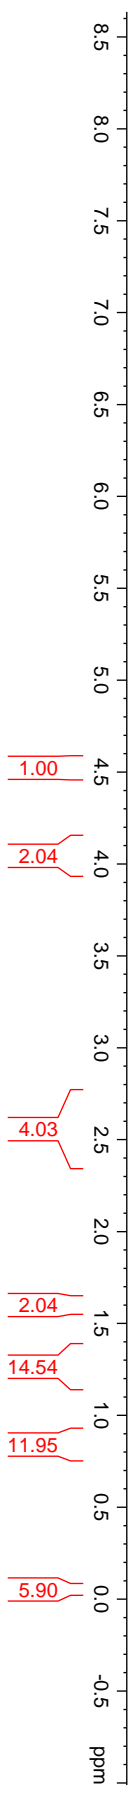

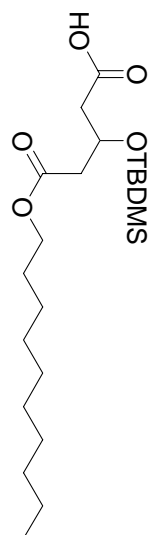

### *HO<sub>2</sub>C-G(10)-OTBDMS*

<sup>13</sup>C NMR (CDCl<sub>3</sub>)

125 MHz

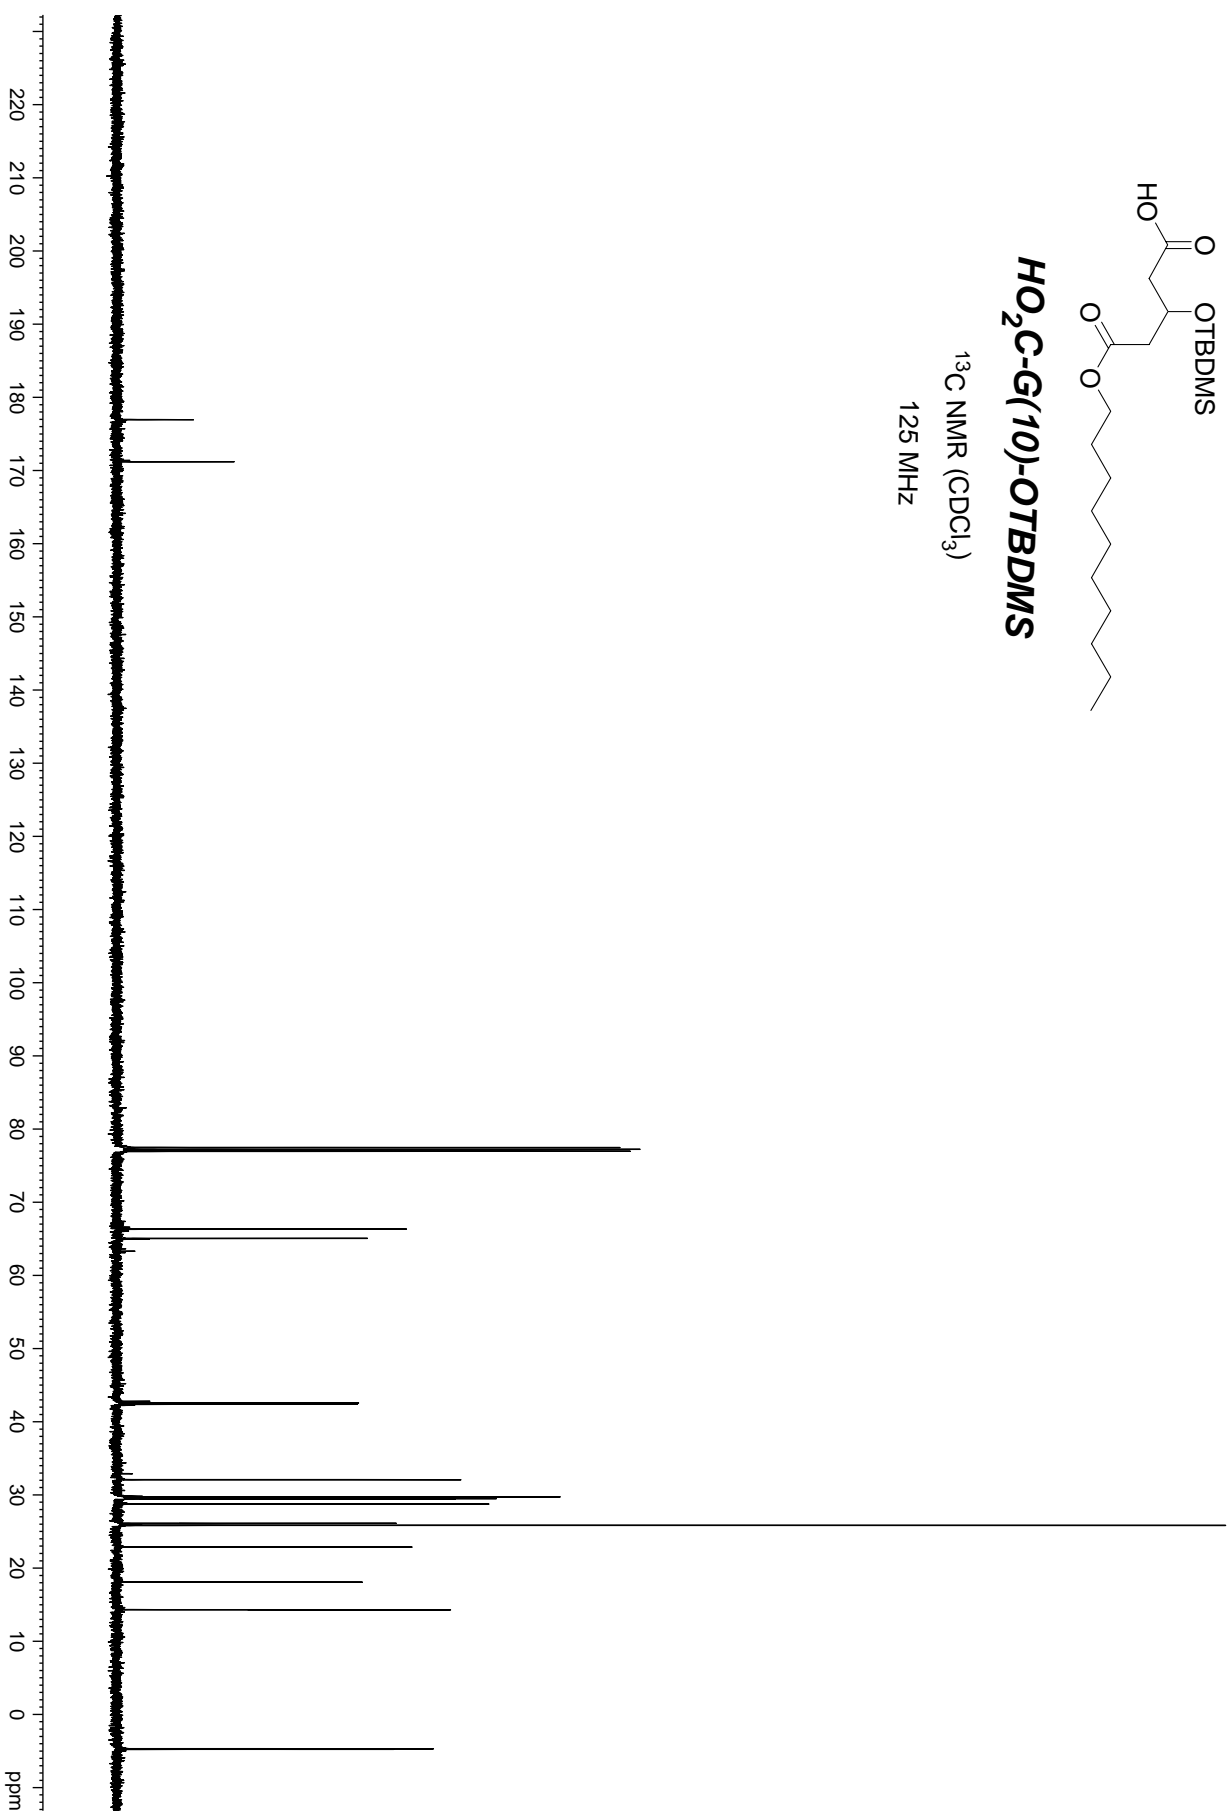

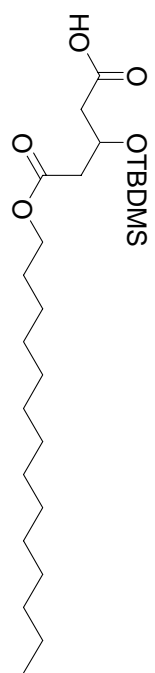

### ***HO<sub>2</sub>C-G(14)-OTBDMS***

<sup>1</sup>H NMR (CDCl<sub>3</sub>)

500 MHz

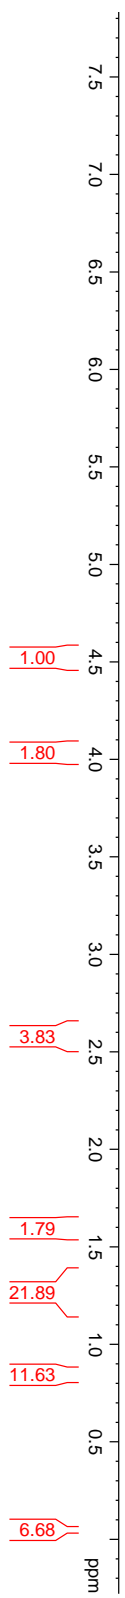

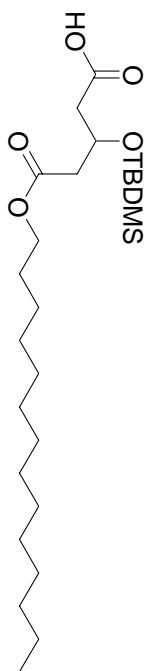

***HO<sub>2</sub>C-G(14)-OTBDMS***

<sup>13</sup>C NMR (CDCl<sub>3</sub>)  
125 MHz

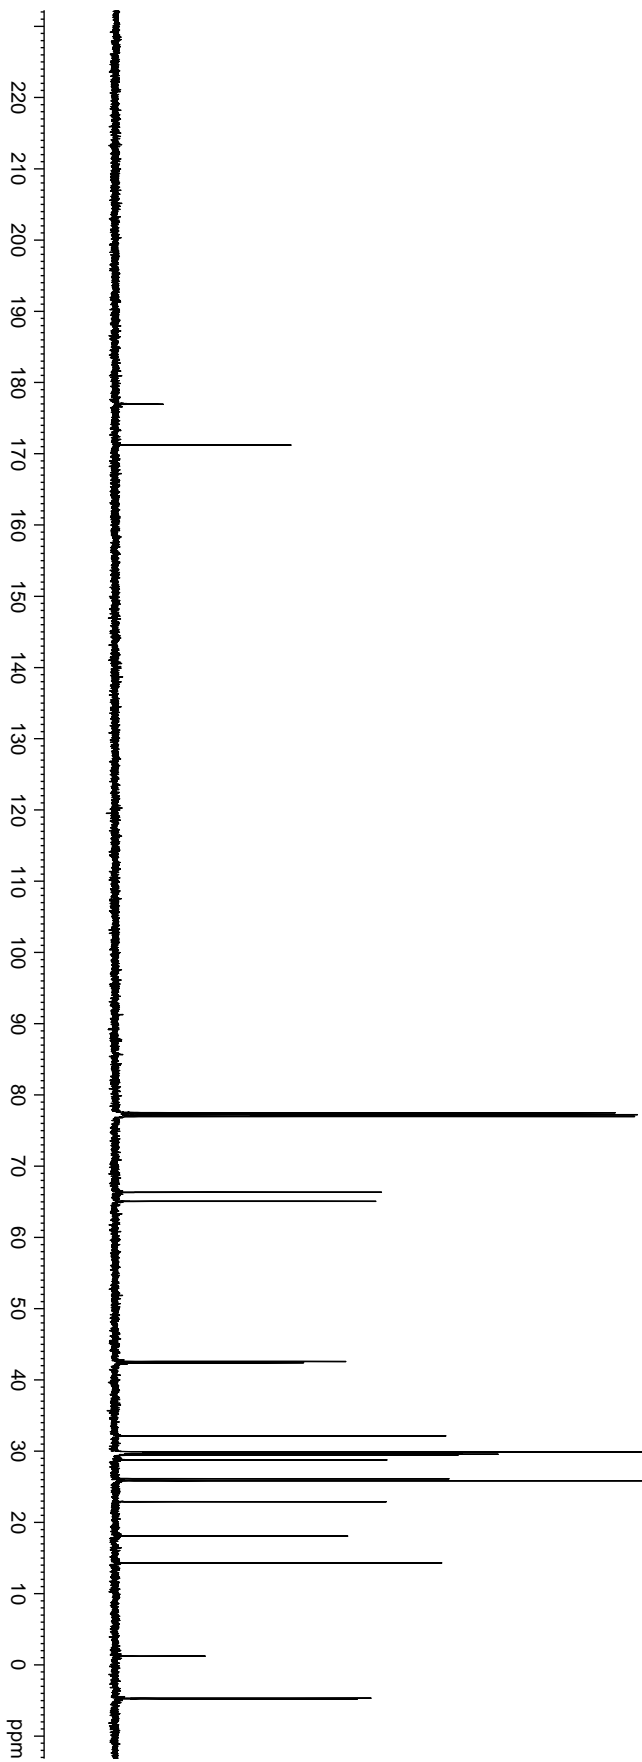



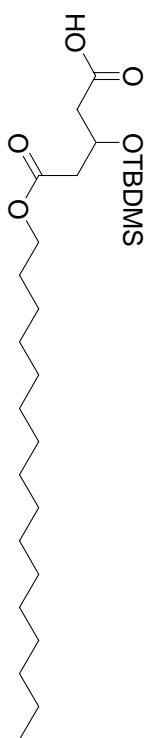

### ***HO<sub>2</sub>C-G(16)-OTBDMS***

<sup>13</sup>C NMR (CDCl<sub>3</sub>)

125 MHz

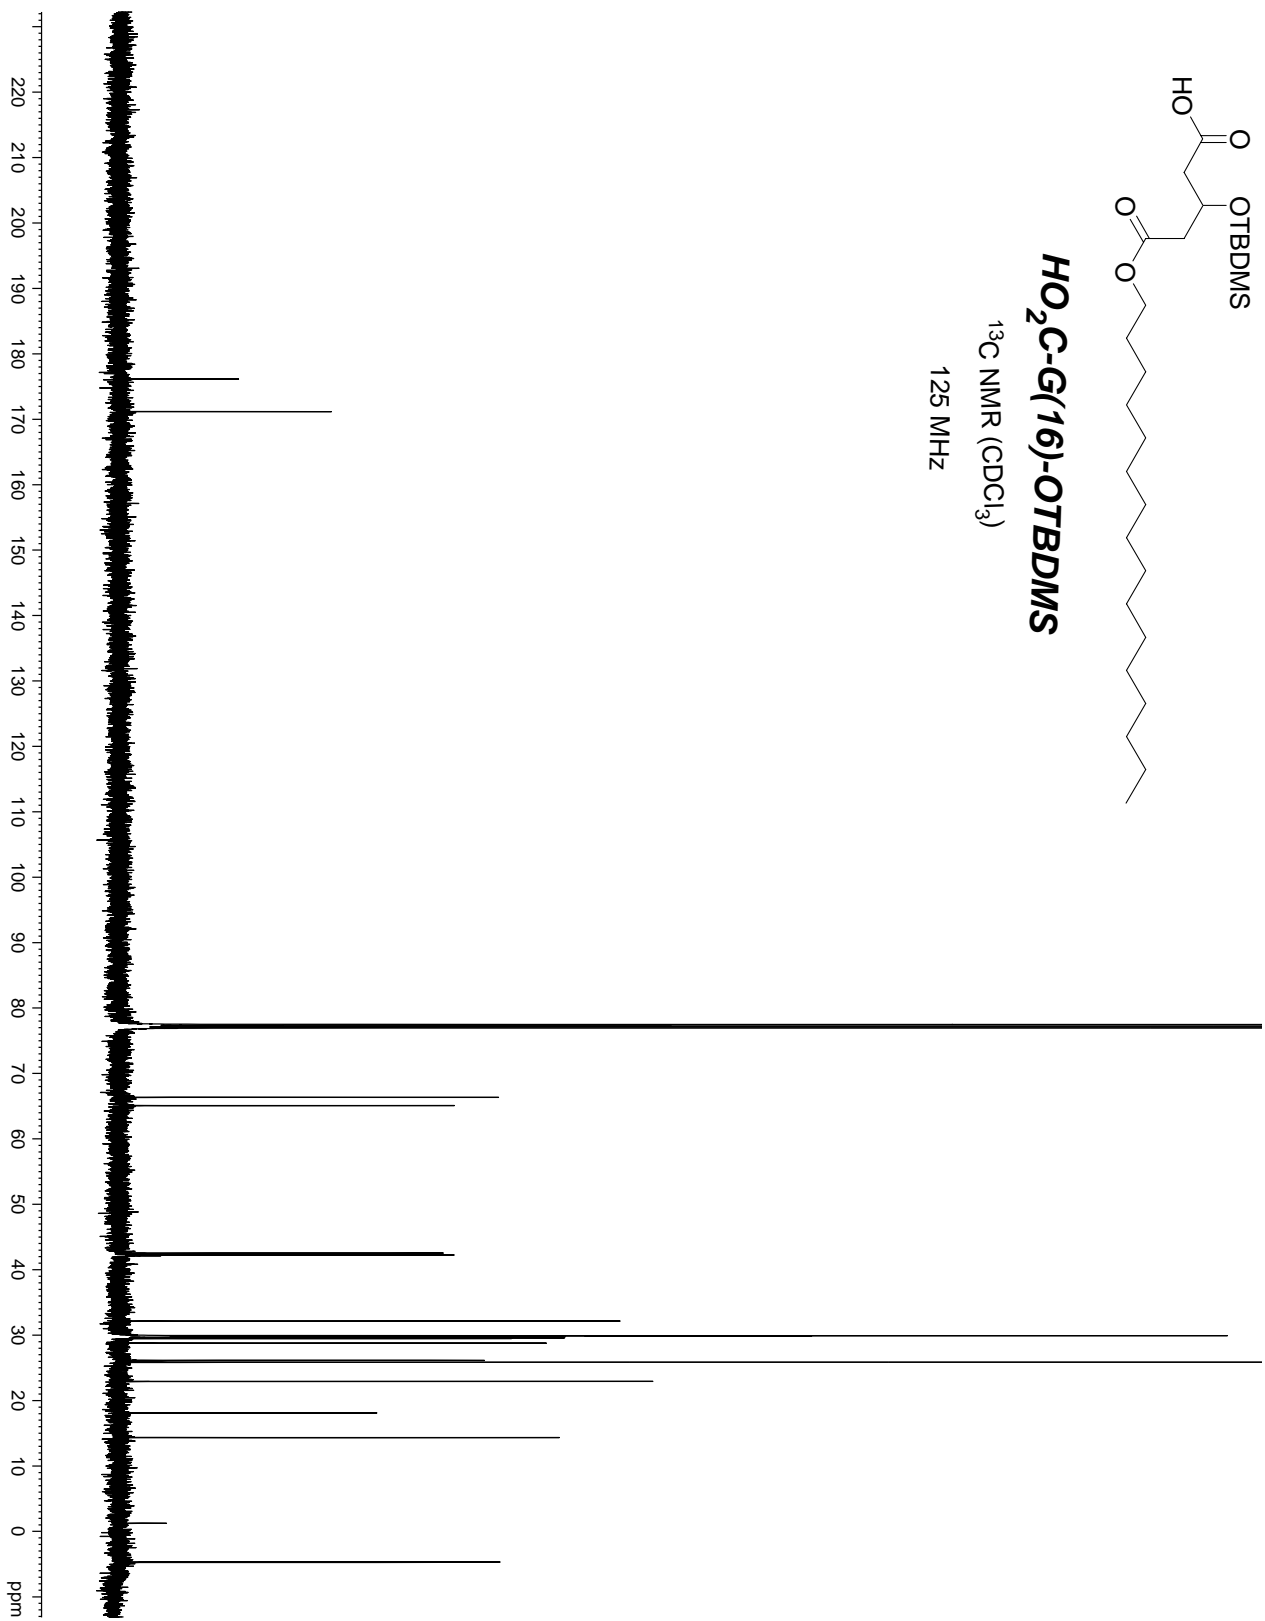

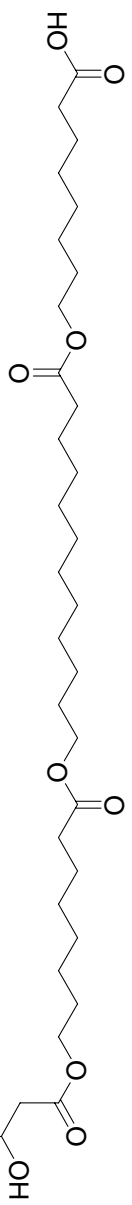

***HO<sub>2</sub>C-Oct-Dod-Oct-G(10)-OH***

<sup>1</sup>H NMR (CDCl<sub>3</sub>)  
500 MHz

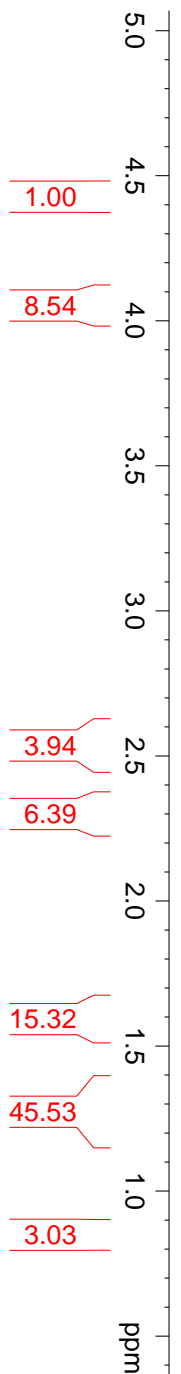



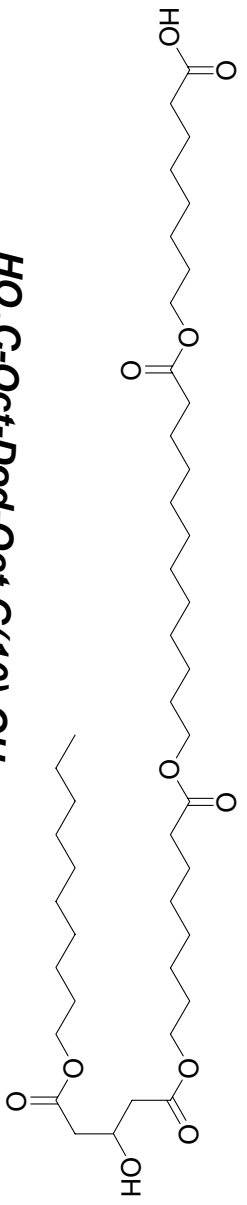

***HO<sub>2</sub>C-Oct-Dod-Oct-G(10)-OH***

<sup>13</sup>C NMR (CDCl<sub>3</sub>)

125 MHz

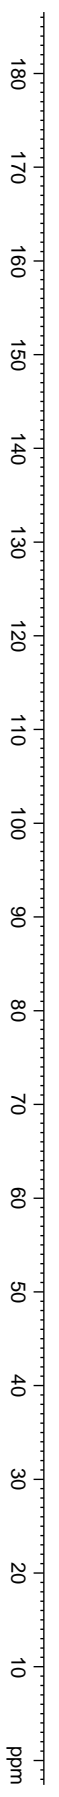

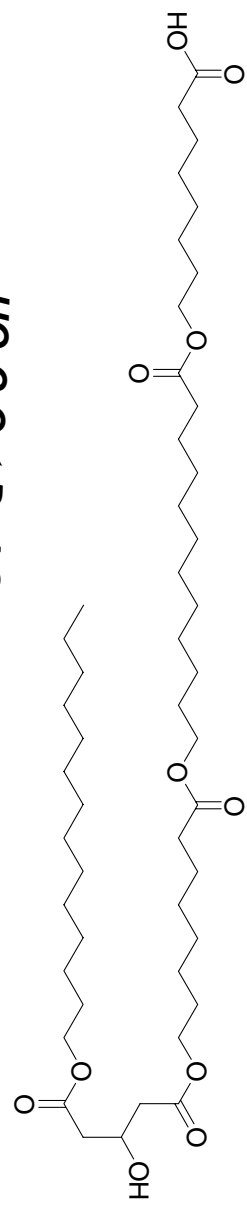

***HO<sub>2</sub>C-Oct-Dod-Oct-G(14)-OH***

<sup>1</sup>H NMR (CDCl<sub>3</sub>)

500 MHz

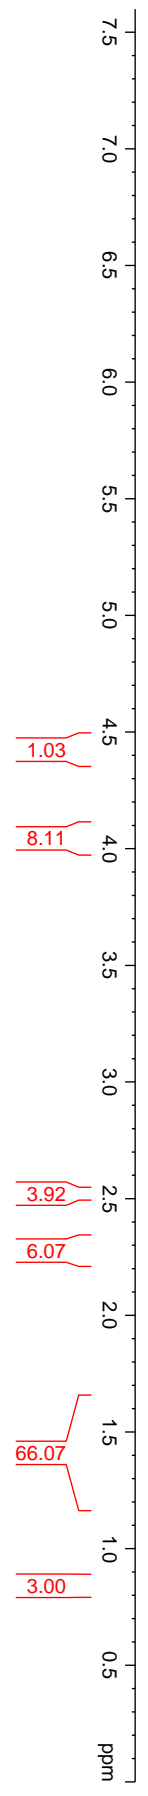

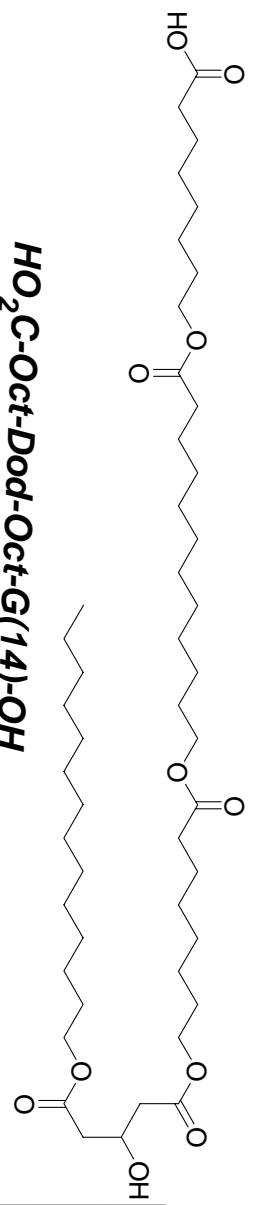

***HO<sub>2</sub>C-Oct-Dod-Oct-G(14)-OH***

<sup>13</sup>C NMR (CDCl<sub>3</sub>)

125 MHz

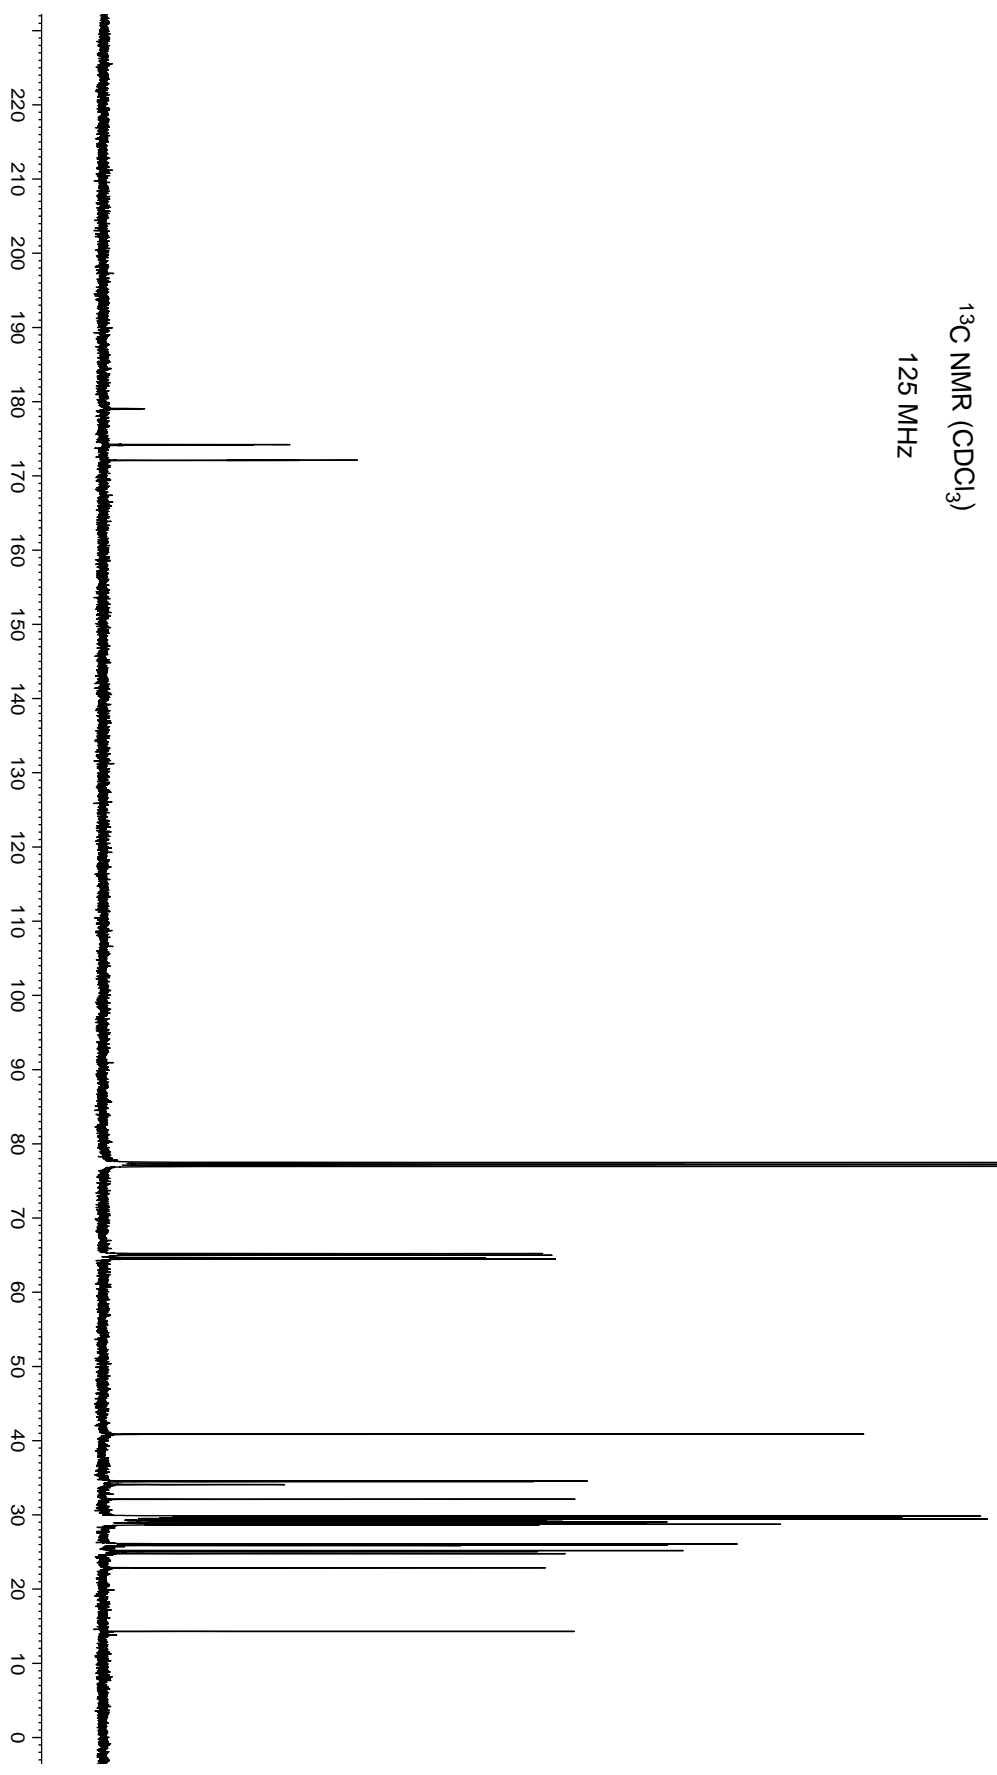

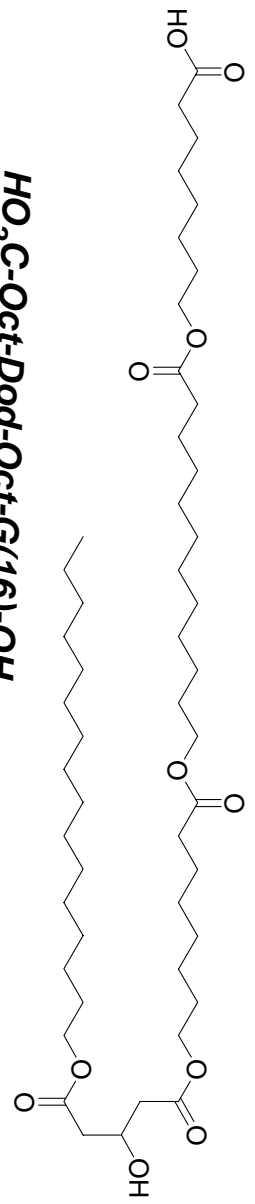

***HO<sub>2</sub>C-Oct-Dod-Oct-G(16)-OH***

<sup>1</sup>H NMR (CDCl<sub>3</sub>)

500 MHz

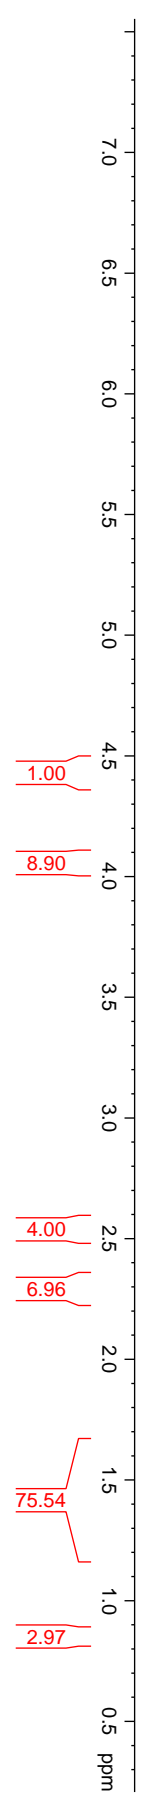

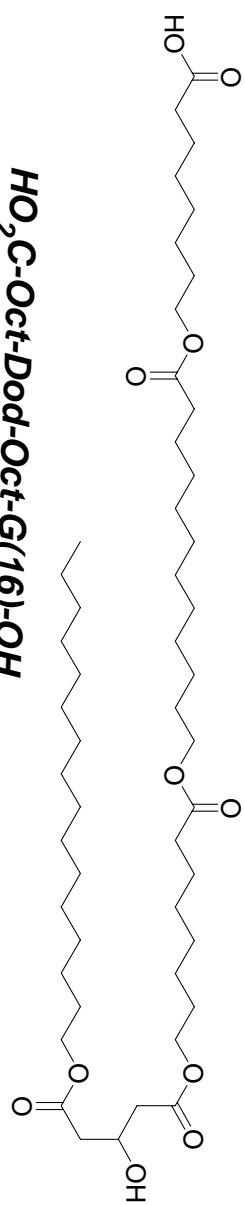

***HO<sub>2</sub>C-Oct-Dod-Oct-G(16)-OH***

<sup>13</sup>C NMR (CDCl<sub>3</sub>)

125 MHz

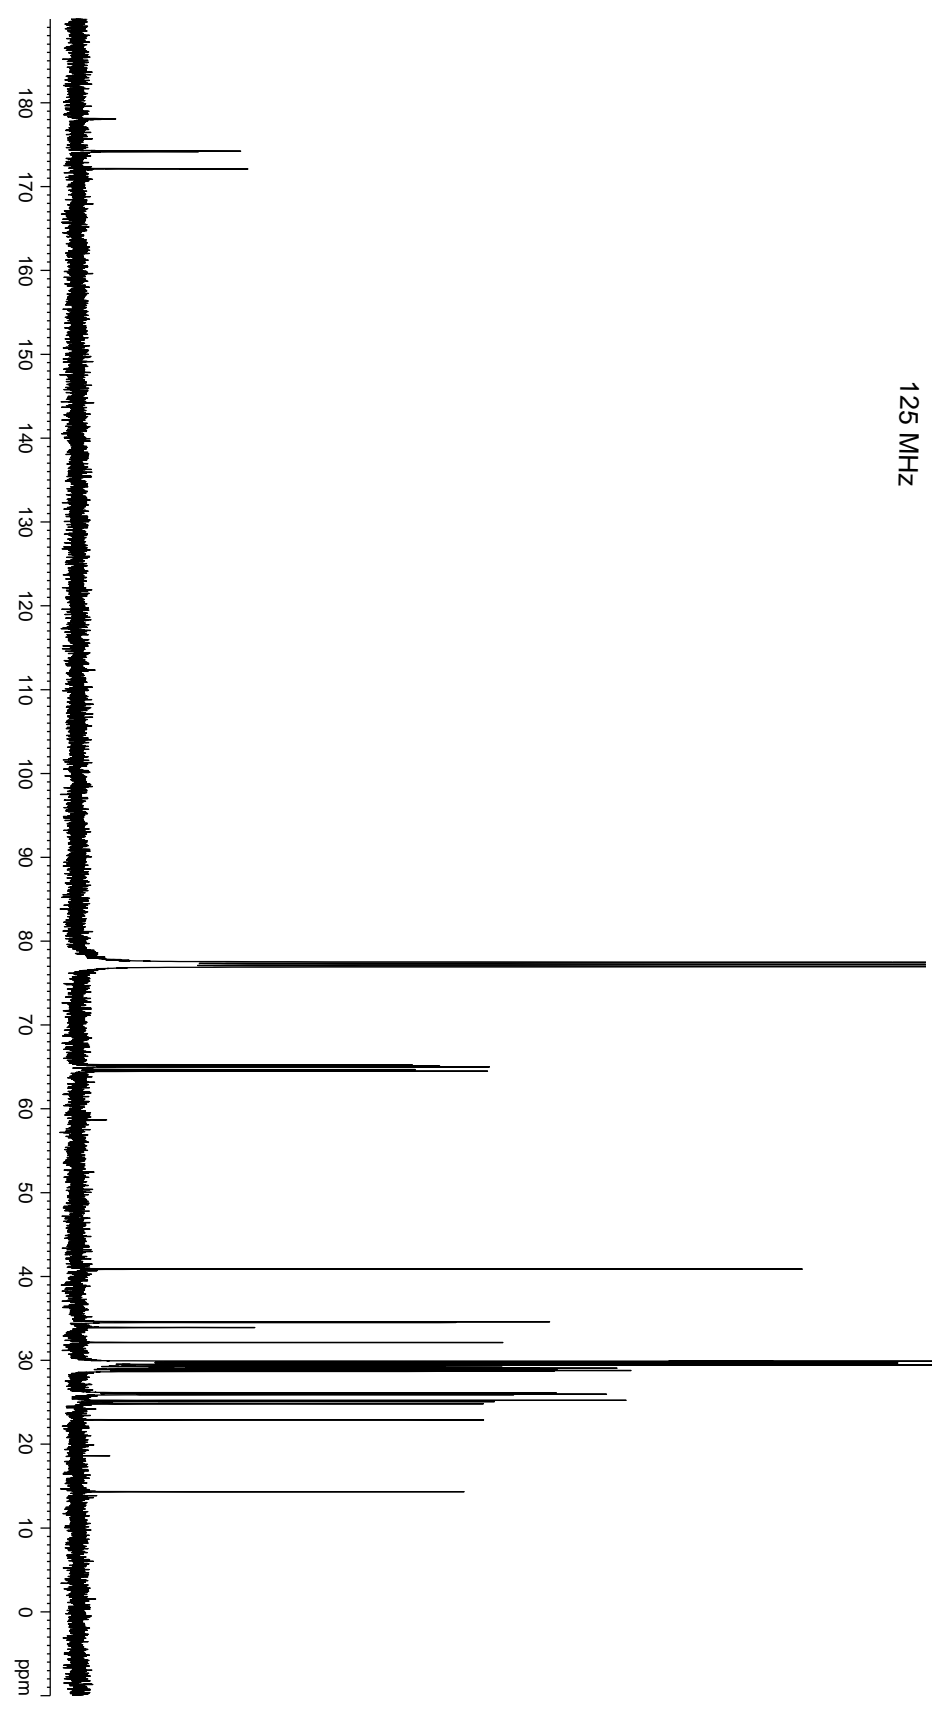

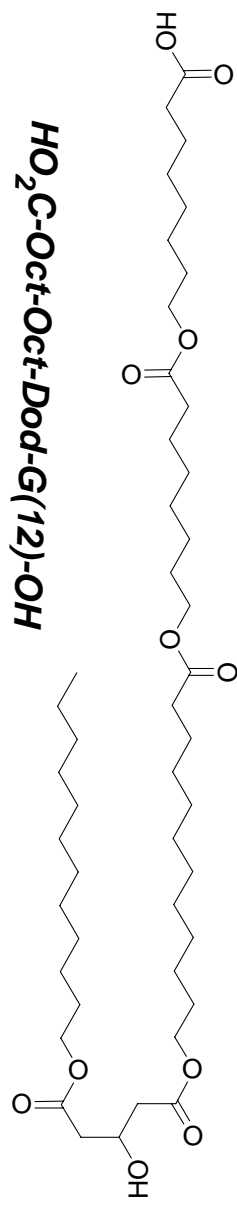

<sup>1</sup>H NMR (CDCl<sub>3</sub>)

500 MHz

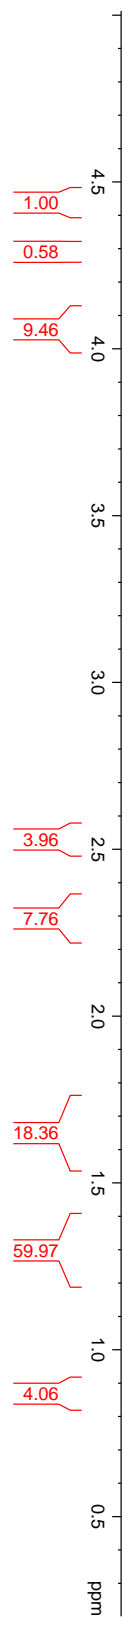

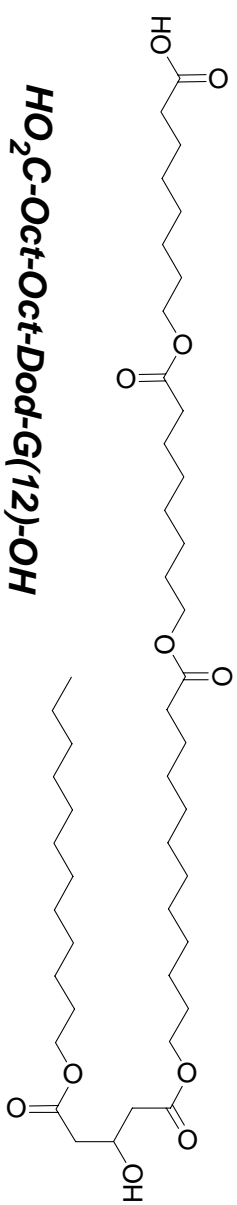

***HO<sub>2</sub>C-Oct-Oct-Dod-G(12)-OH***

<sup>13</sup>C NMR (CDCl<sub>3</sub>)

125 MHz

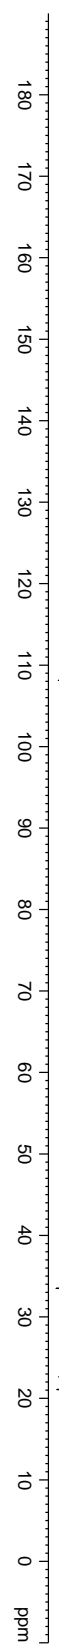

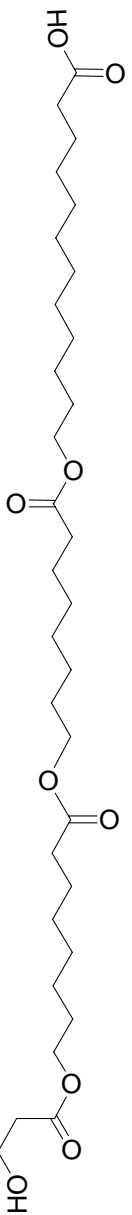

***HO<sub>2</sub>C-Dod-Oct-Oct-G(12)-OH***

<sup>1</sup>H NMR (CDCl<sub>3</sub>)  
500 MHz

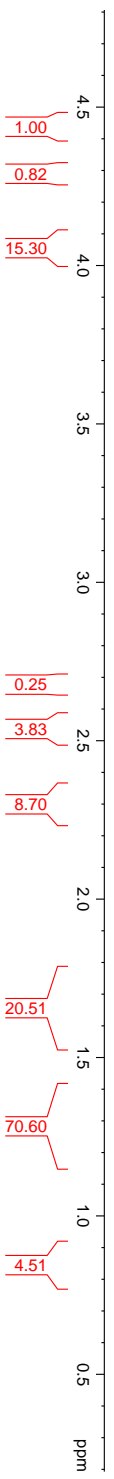



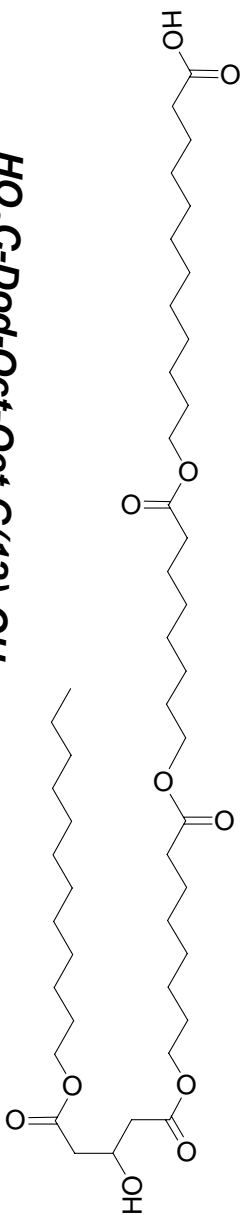

***HO<sub>2</sub>C-Dod-Oct-Oct-G(12)-OH***

<sup>13</sup>C NMR (CDCl<sub>3</sub>)

125 MHz

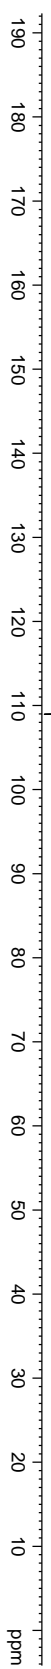

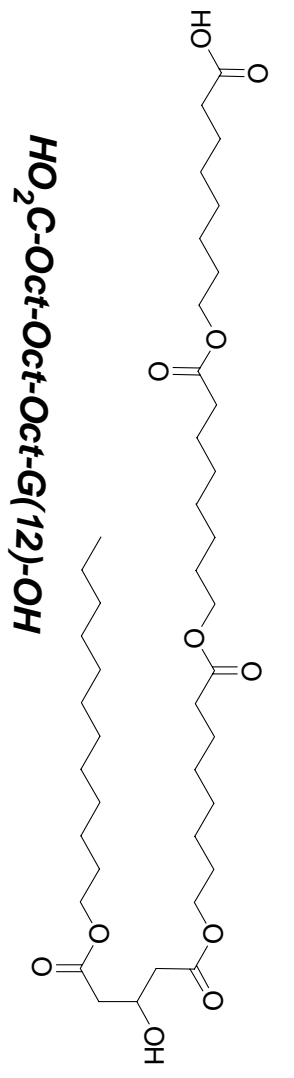

***HO<sub>2</sub>C-Oct-Oct-G(12)-OH***

<sup>1</sup>H NMR (CDCl<sub>3</sub>)

500 MHz

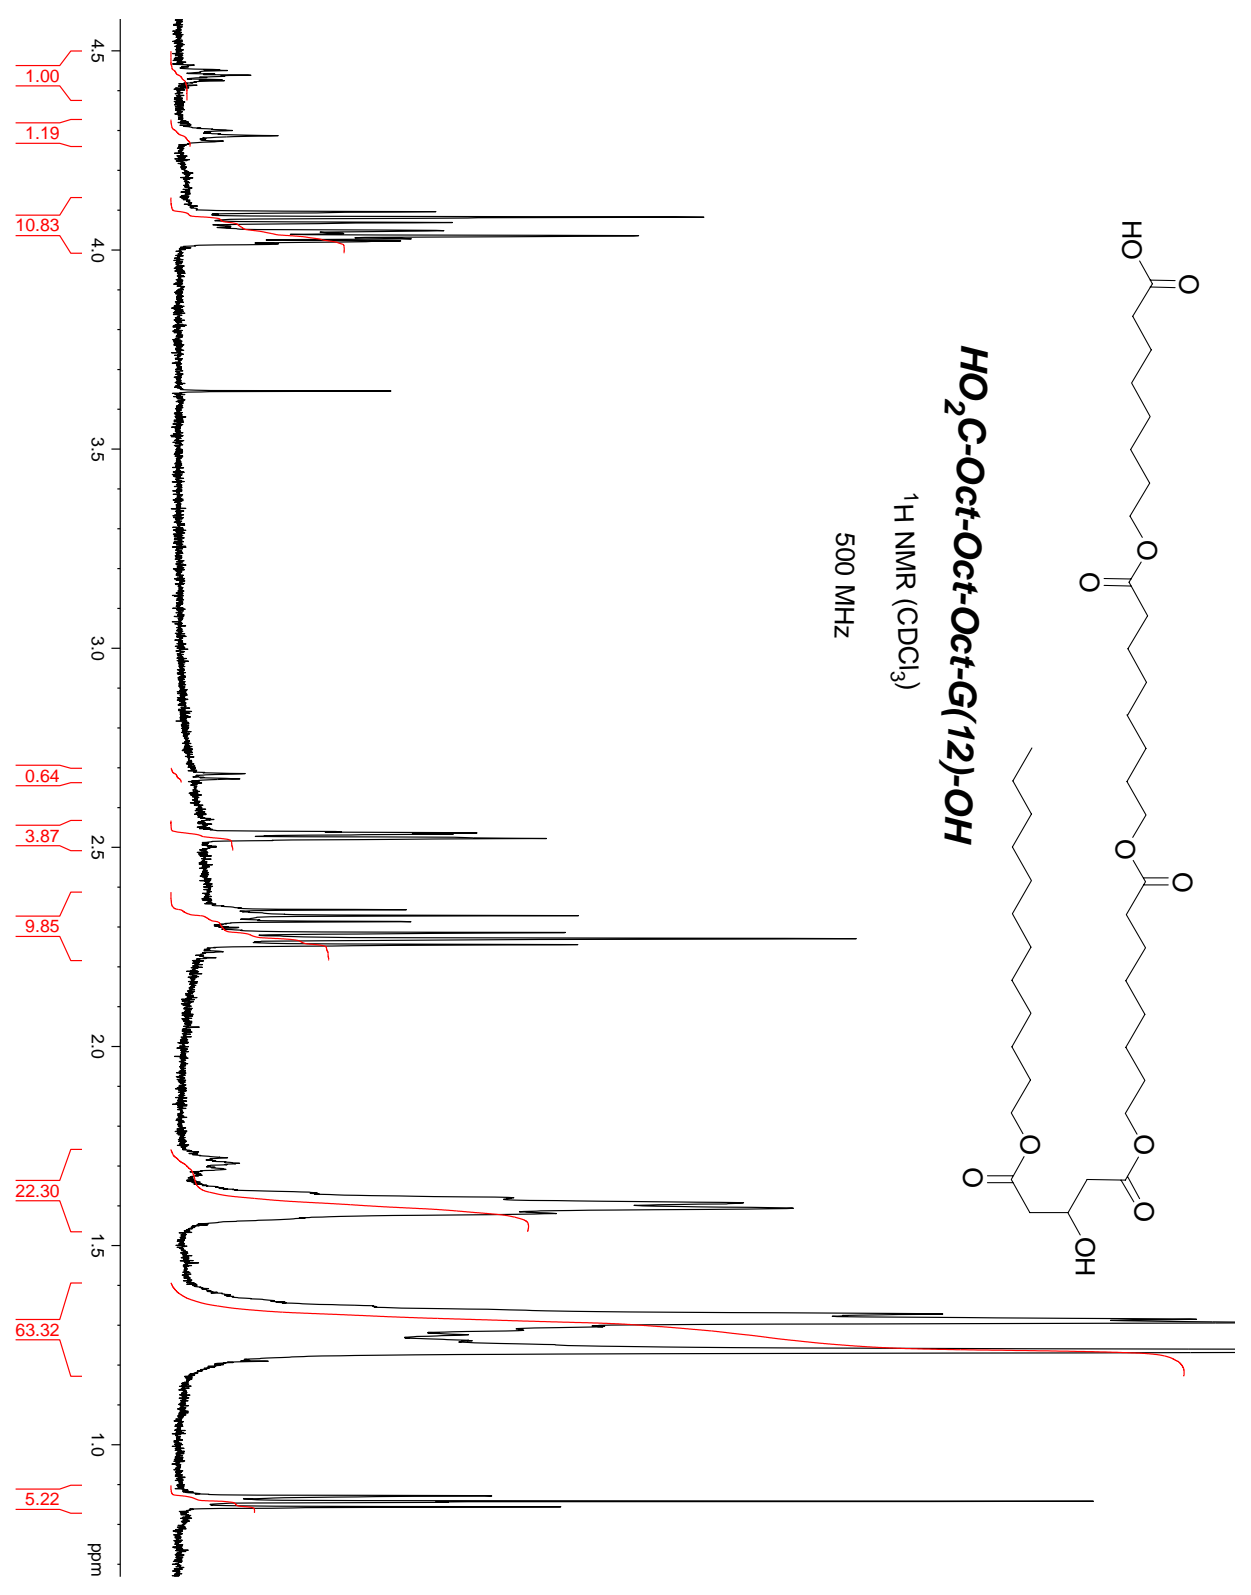

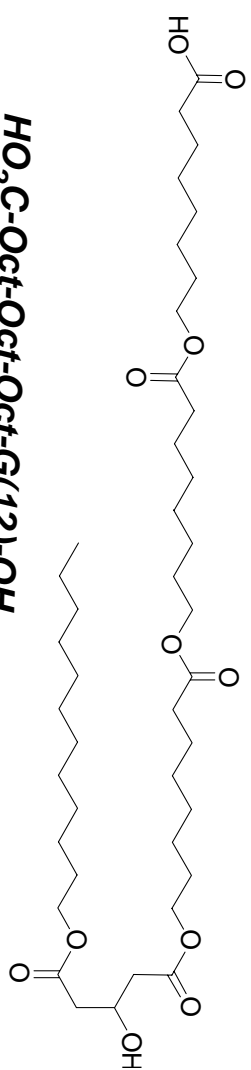

***HO<sub>2</sub>C-Oct-Oct-Oct-G(12)-OH***

<sup>13</sup>C NMR (CDCl<sub>3</sub>)

125 MHz

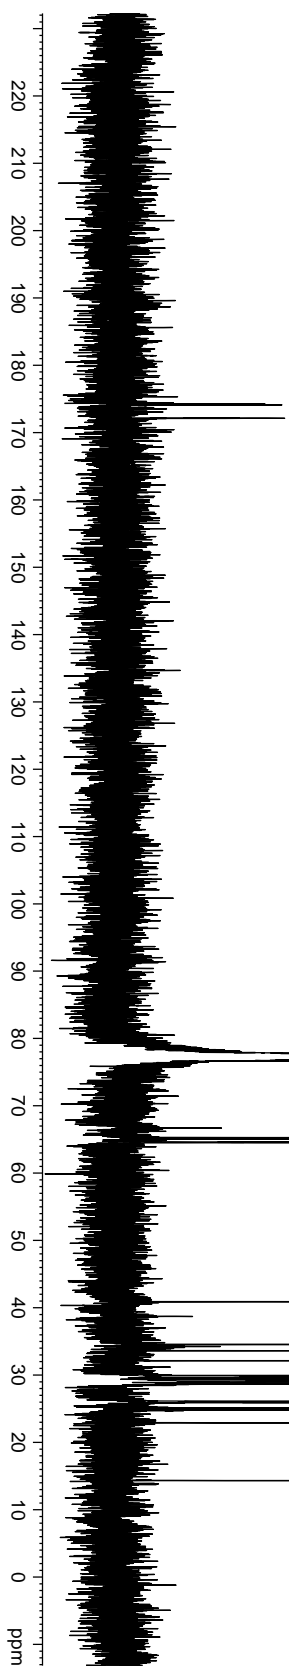

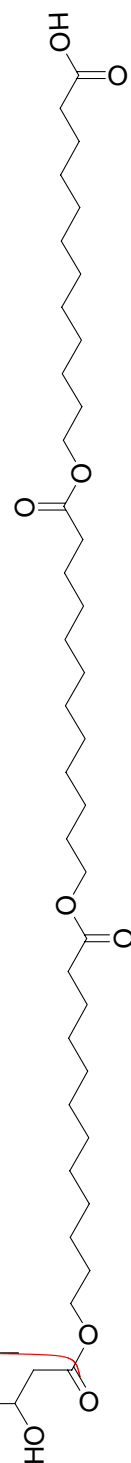

***HO<sub>2</sub>C-Dod-Dod-Dod-G(12)-OH***

<sup>1</sup>H NMR (CDCl<sub>3</sub>)  
500 MHz

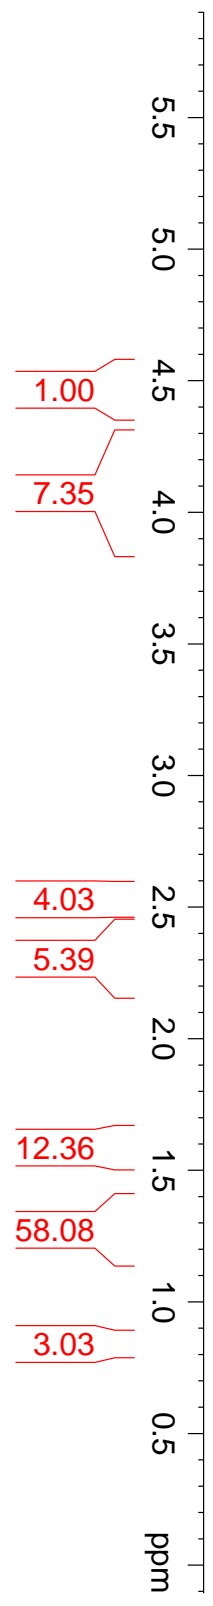

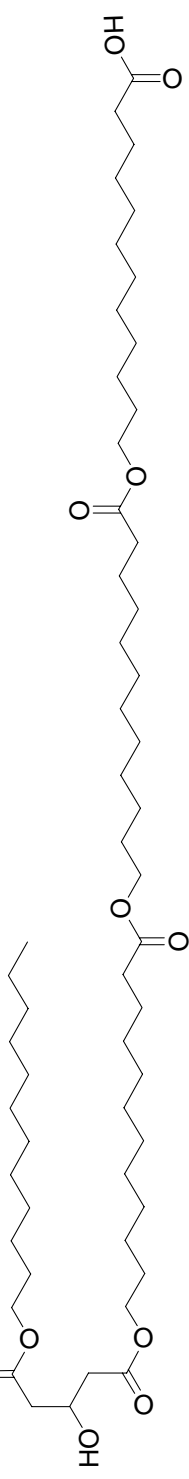

**HO<sub>2</sub>C-Dod-Dod-Dod-G(12)-OH**

<sup>13</sup>C NMR (CDCl<sub>3</sub>)  
125 MHz

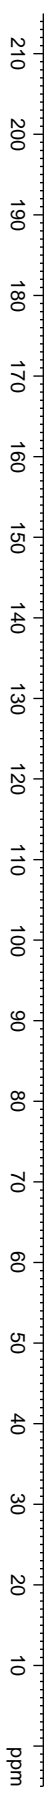

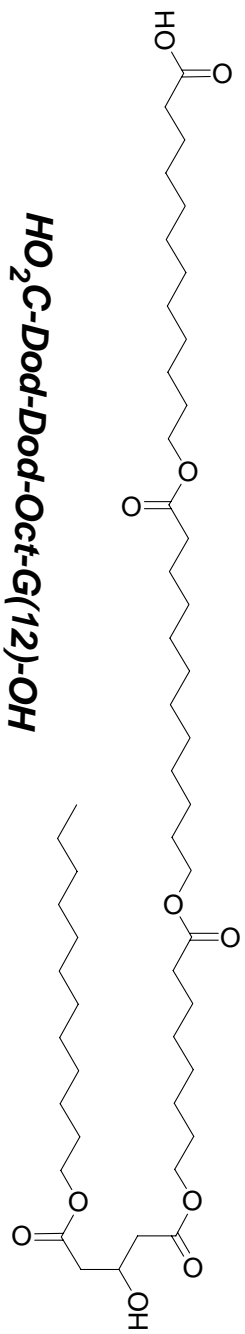

***HO<sub>2</sub>C-Dod-Dod-Oct-G(12)-OH***

<sup>1</sup>H NMR (CDCl<sub>3</sub>)

500 MHz

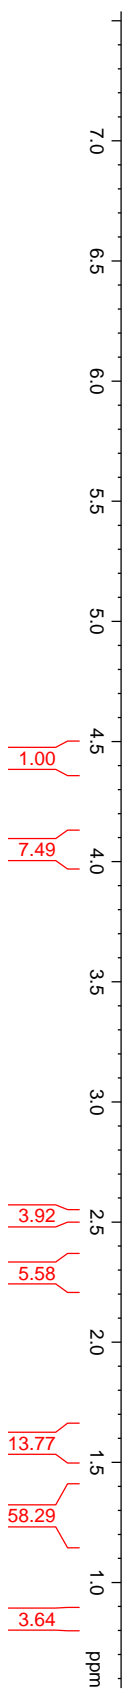

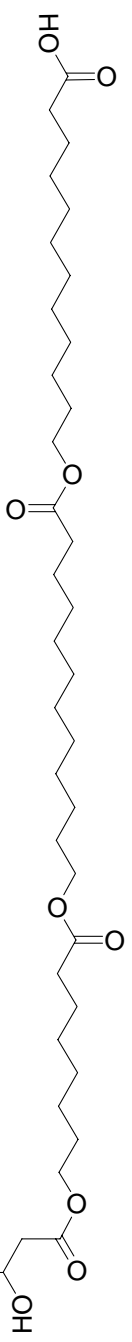

***HO<sub>2</sub>C-Dod-Dod-Oct-G(12)-OH***

<sup>13</sup>C NMR (CDCl<sub>3</sub>)

125 MHz

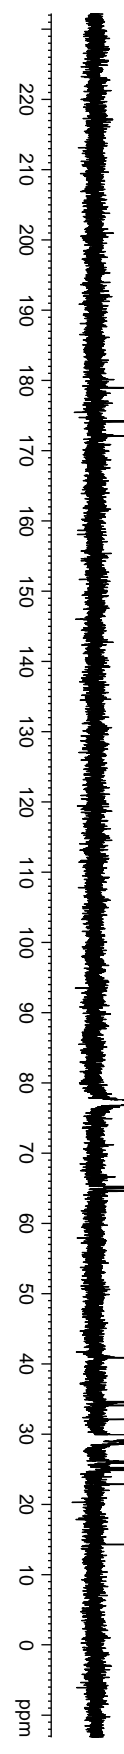

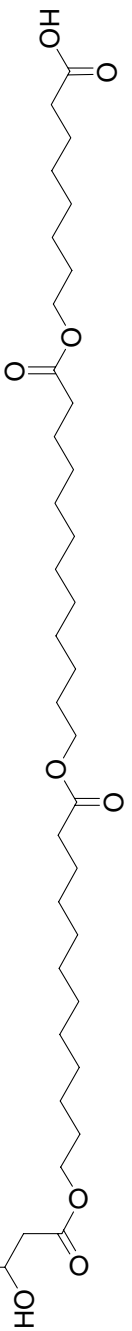

***HO<sub>2</sub>C-Oct-Dod-Dod-G(12)-OH***

<sup>1</sup>H NMR (CDCl<sub>3</sub>)

500 MHz

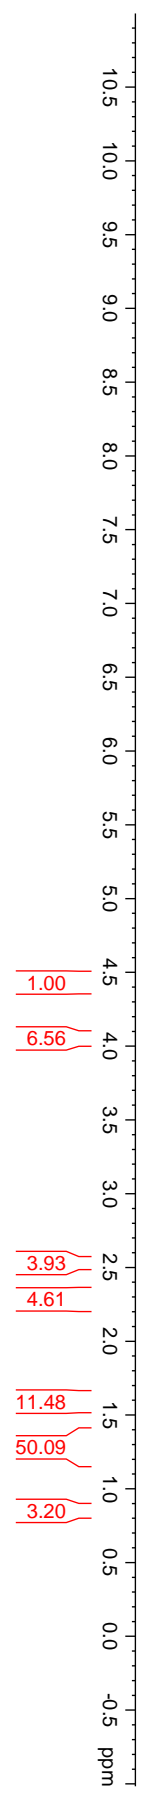



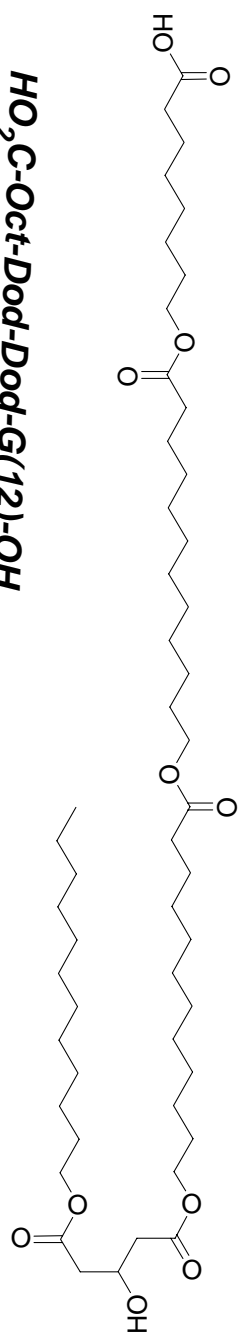

***HO<sub>2</sub>C-Oct-Dod-Dod-G(12)-OH***

<sup>13</sup>C NMR (CDCl<sub>3</sub>)

125 MHz

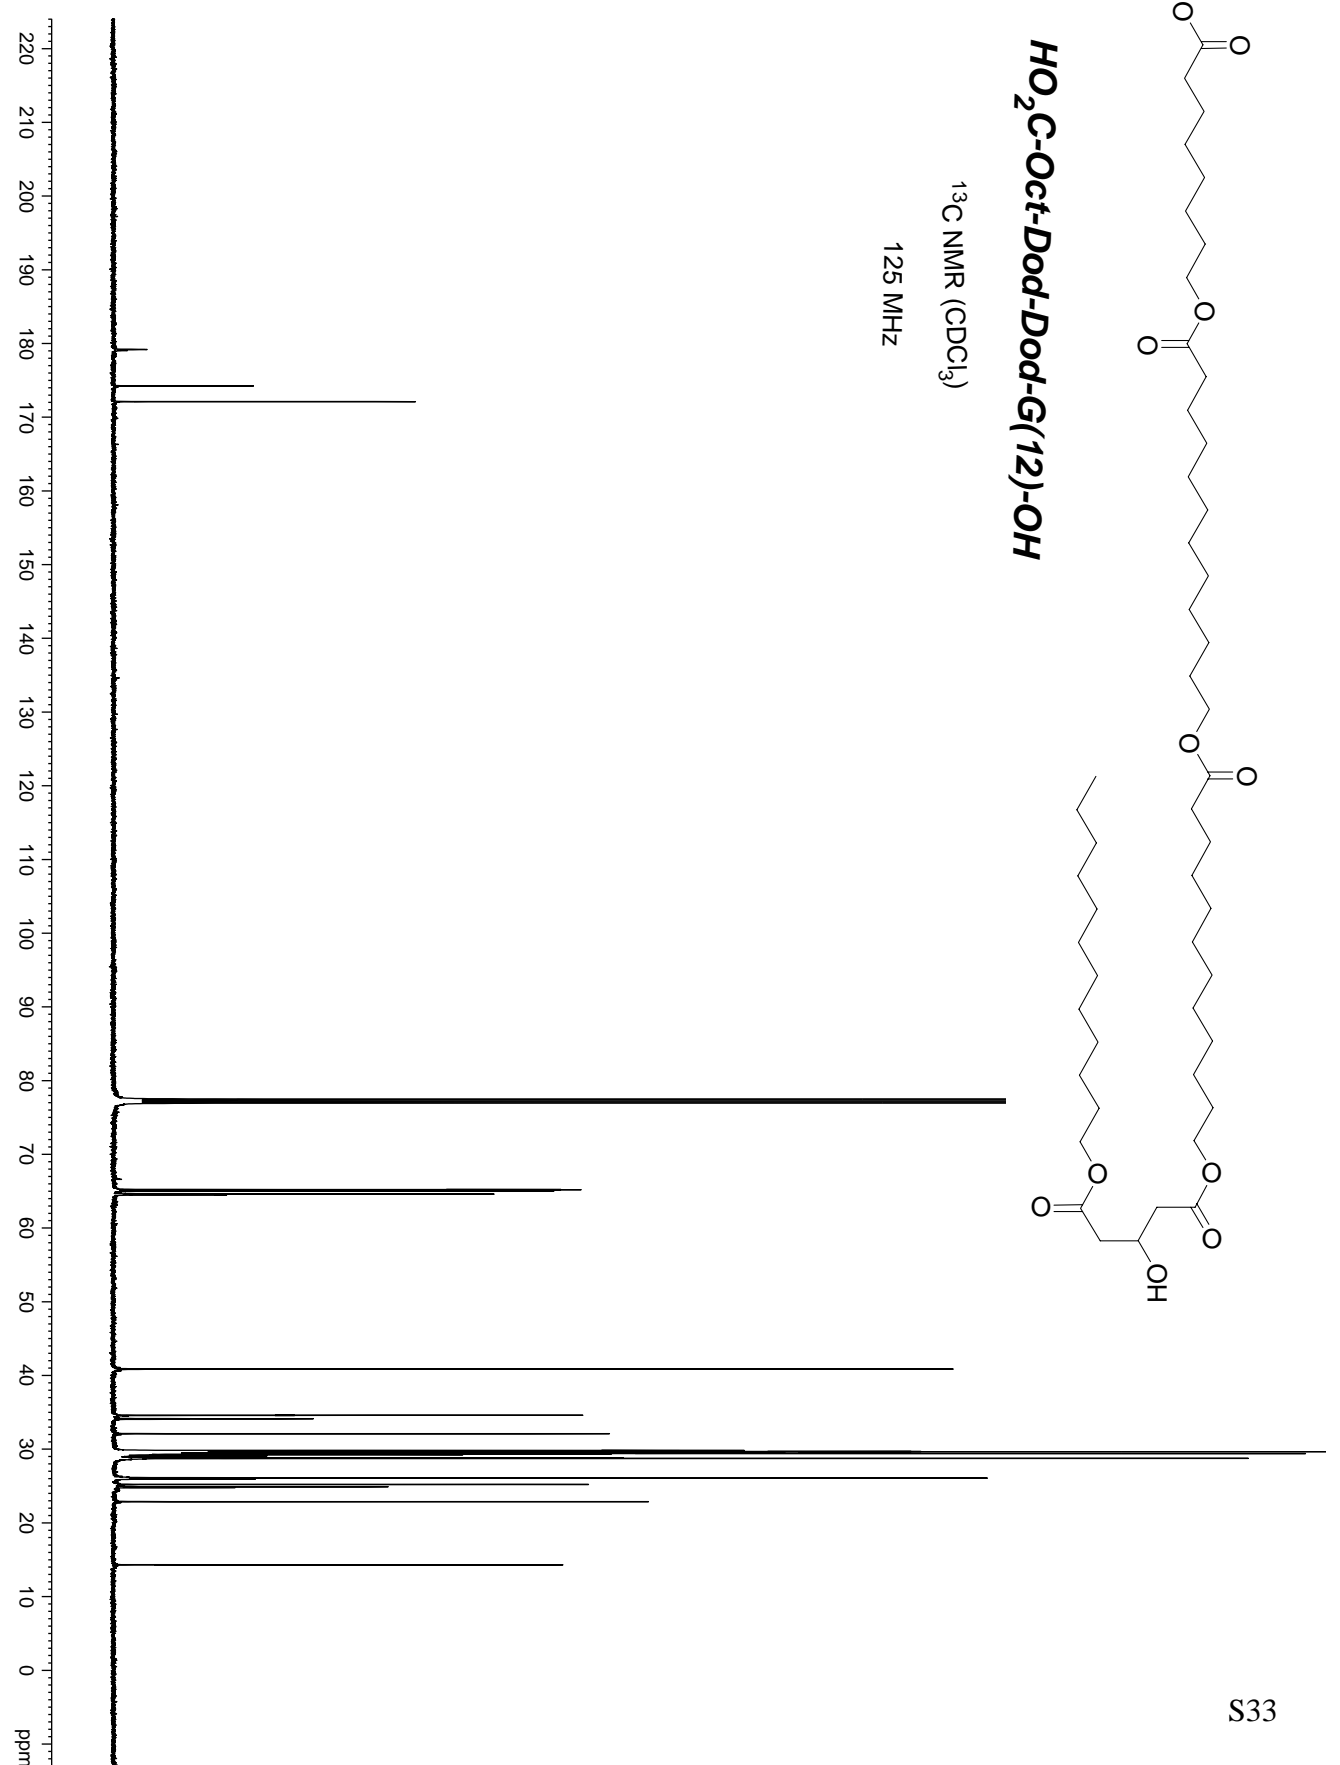

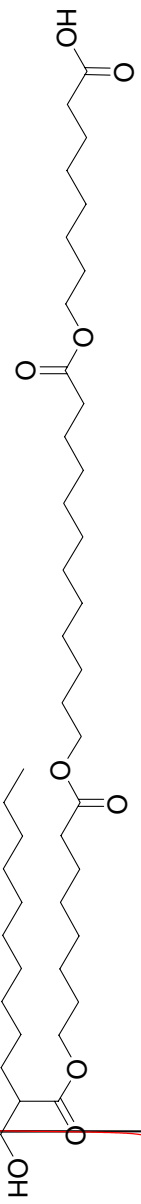

***HO<sub>2</sub>C-Oct-Dod-Oct-Lau-OH***

<sup>1</sup>H NMR (CDCl<sub>3</sub>)

500 MHz

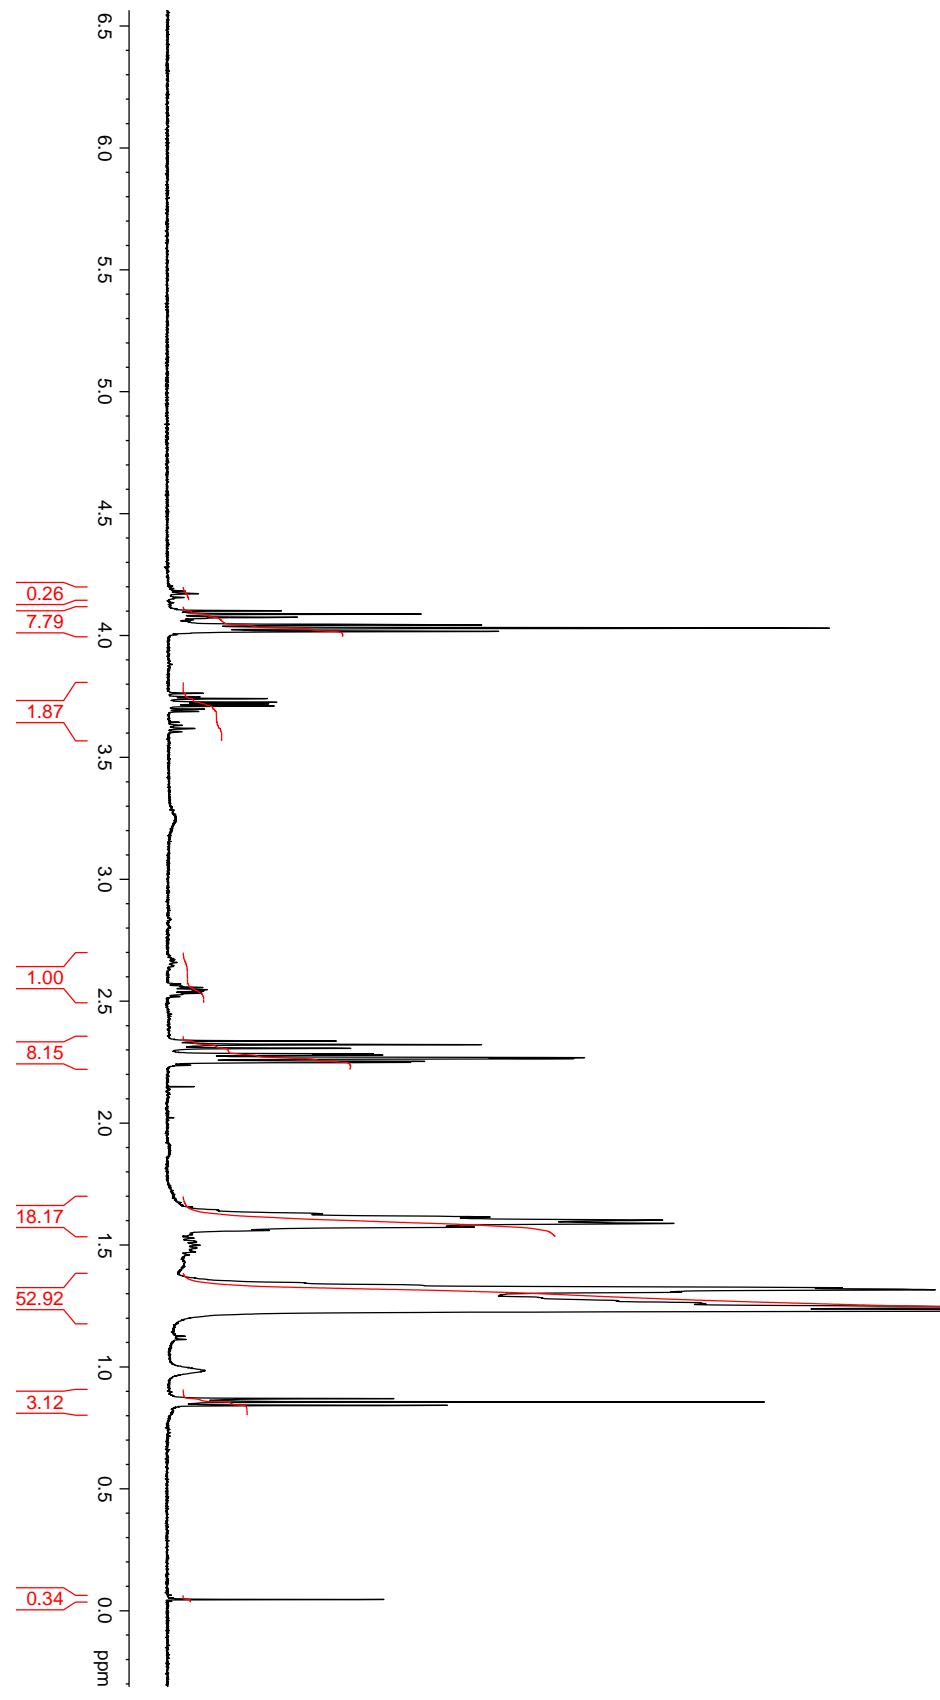

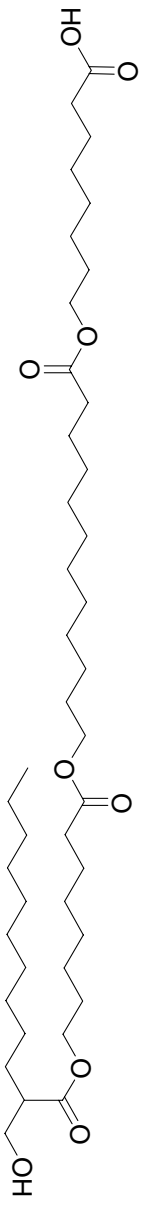

***HO<sub>2</sub>C-Oct-Dod-Oct-Lau-OH***

<sup>13</sup>C NMR (CDCl<sub>3</sub>)

125 MHz

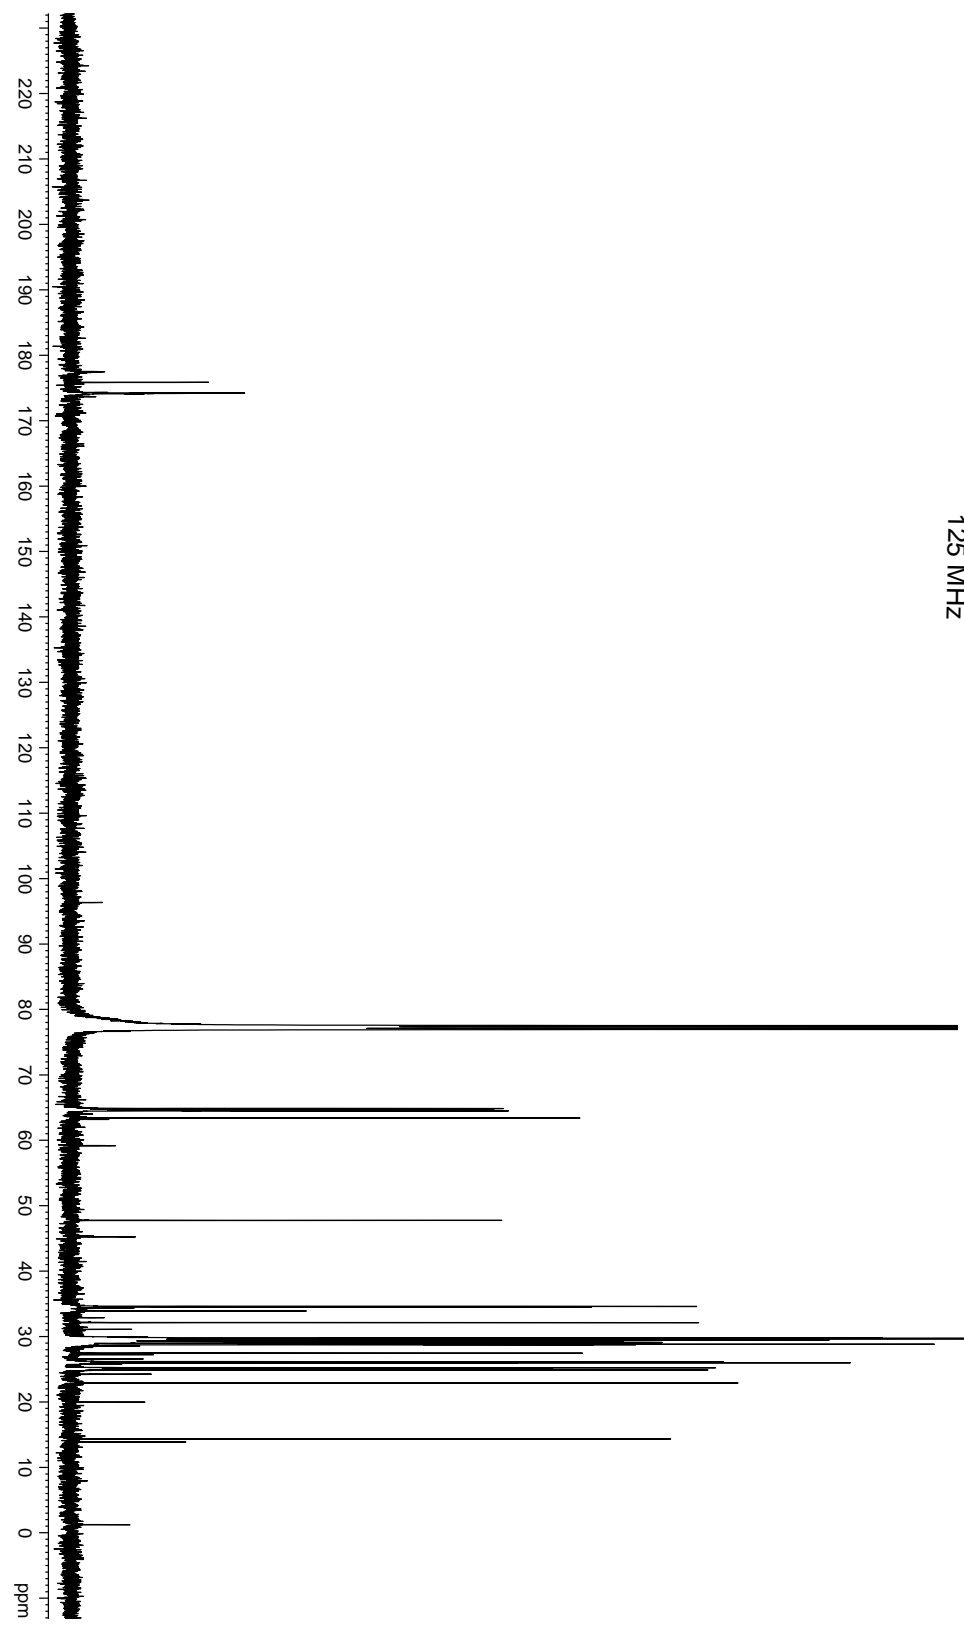

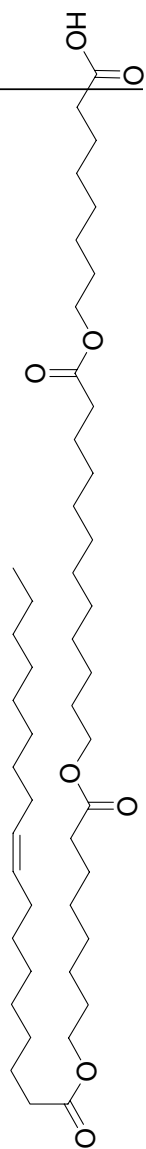

***HO<sub>2</sub>C-Oct-Dod-Oct-Oleate***

<sup>1</sup>H NMR (CDCl<sub>3</sub>)

500 MHz

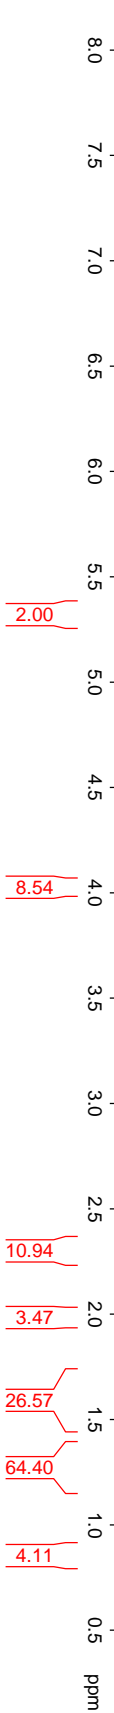

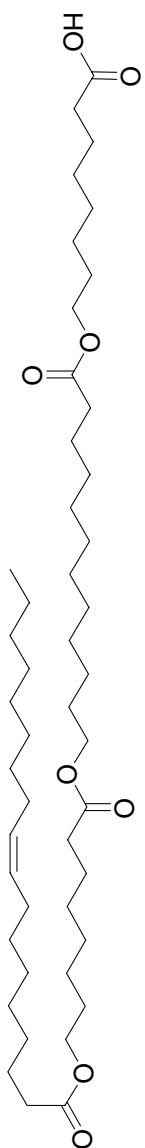

***HO<sub>2</sub>C-Oct-Dod-Oct-Oleate***

<sup>13</sup>C NMR (CDCl<sub>3</sub>)

125 MHz

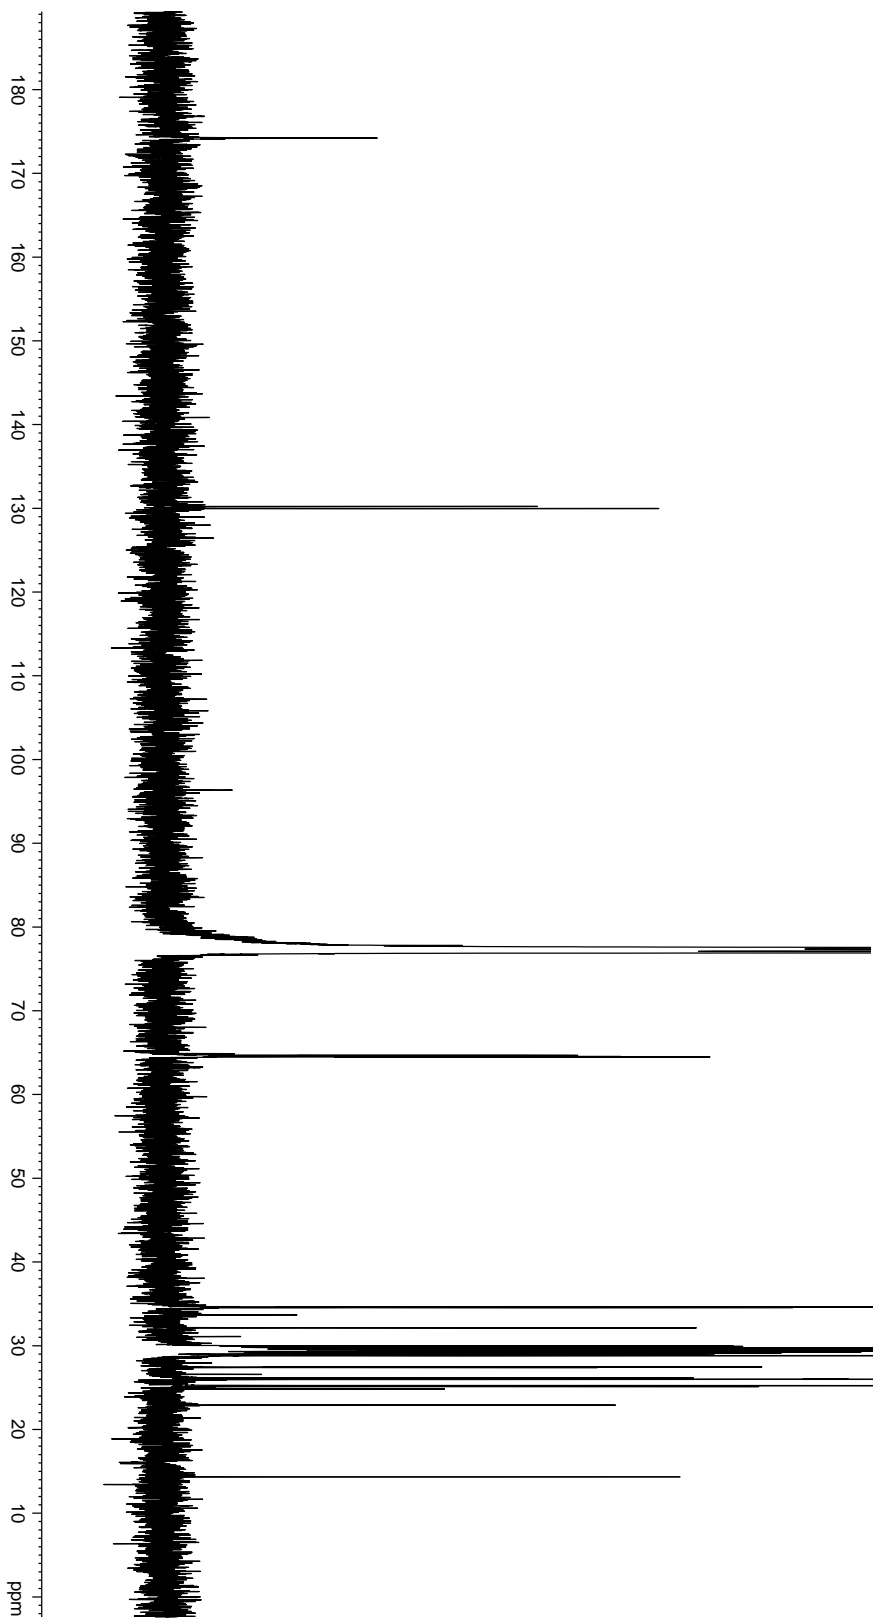

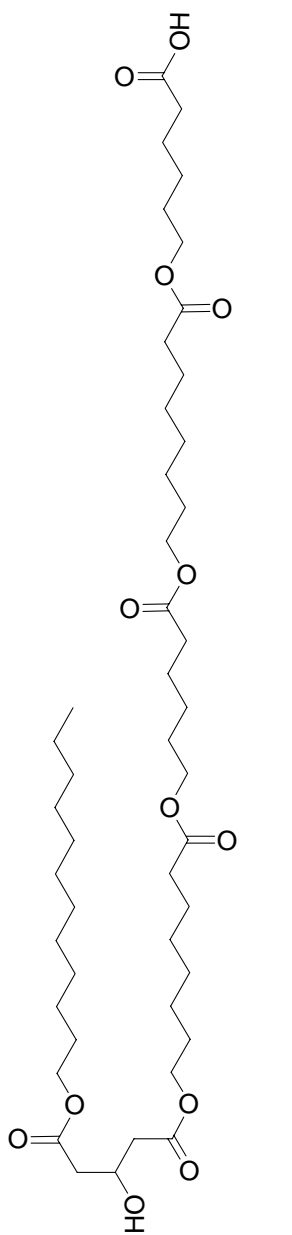

***HO<sub>2</sub>C-Hex-Oct-Hex-Oct-G(12)-OH***

<sup>1</sup>H NMR (CDCl<sub>3</sub>)  
500 MHz

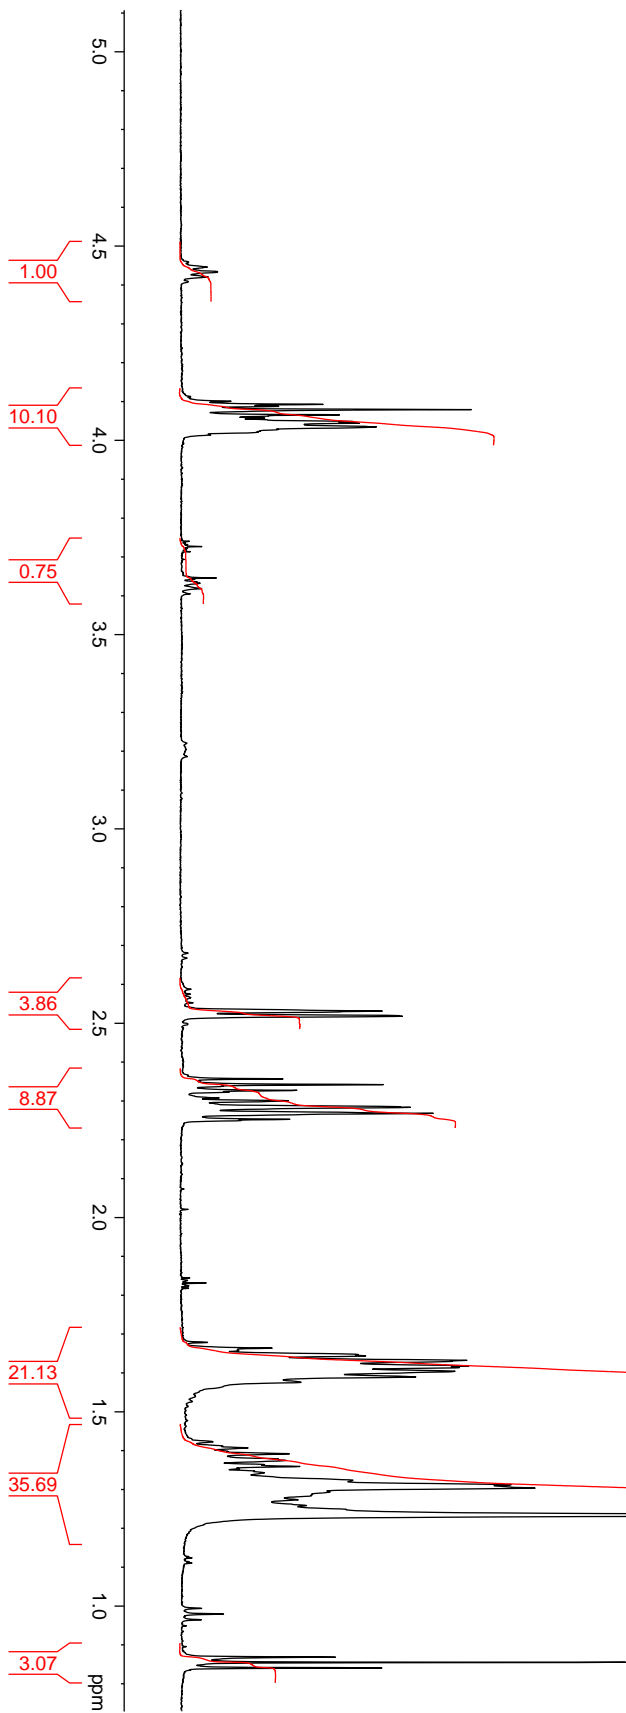

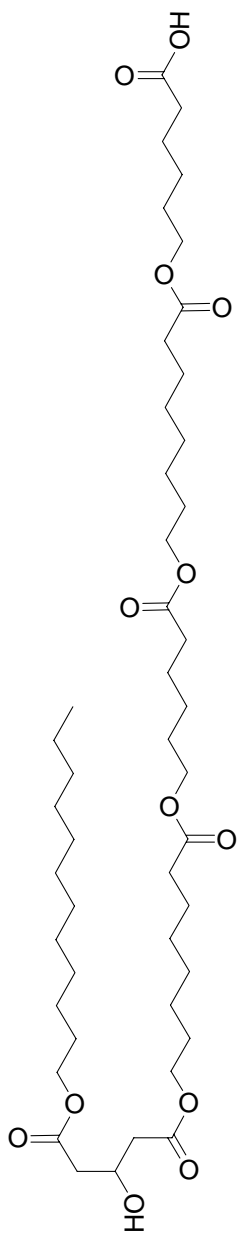

***HO<sub>2</sub>C-Hex-Oct-Hex-Oct-G(12)-OH***

<sup>13</sup>C NMR (CDCl<sub>3</sub>)

125 MHz

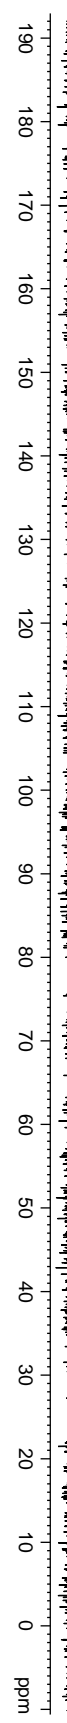

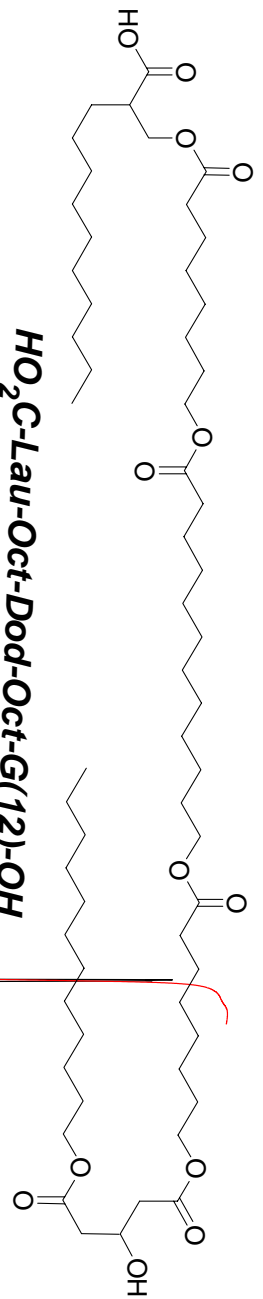

***HO<sub>2</sub>C-Lau-Oct-Dod-Oct-G(12)-OH***

<sup>1</sup>H NMR (CDCl<sub>3</sub>)  
500 MHz

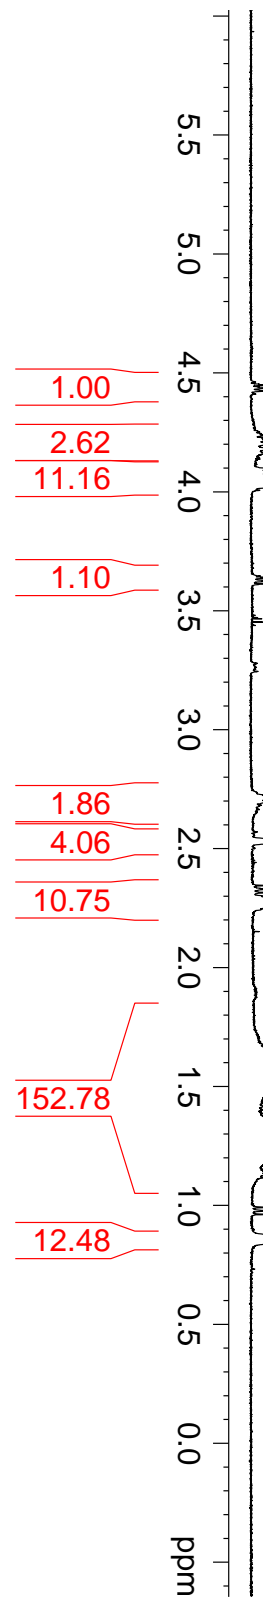



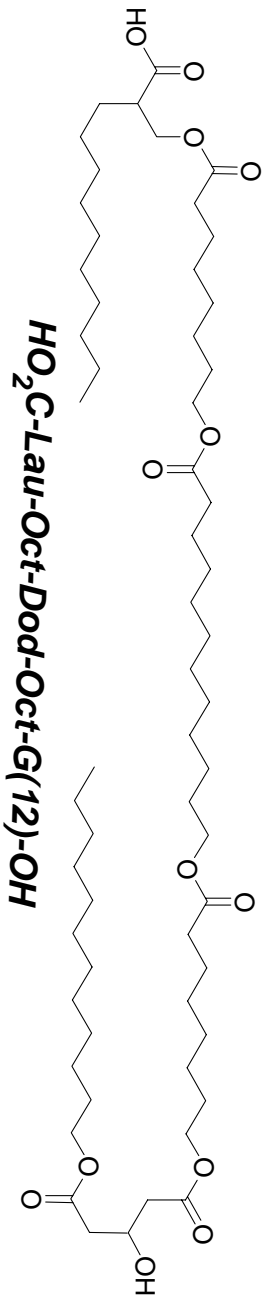

<sup>13</sup>C NMR (CDCl<sub>3</sub>)

125 MHz

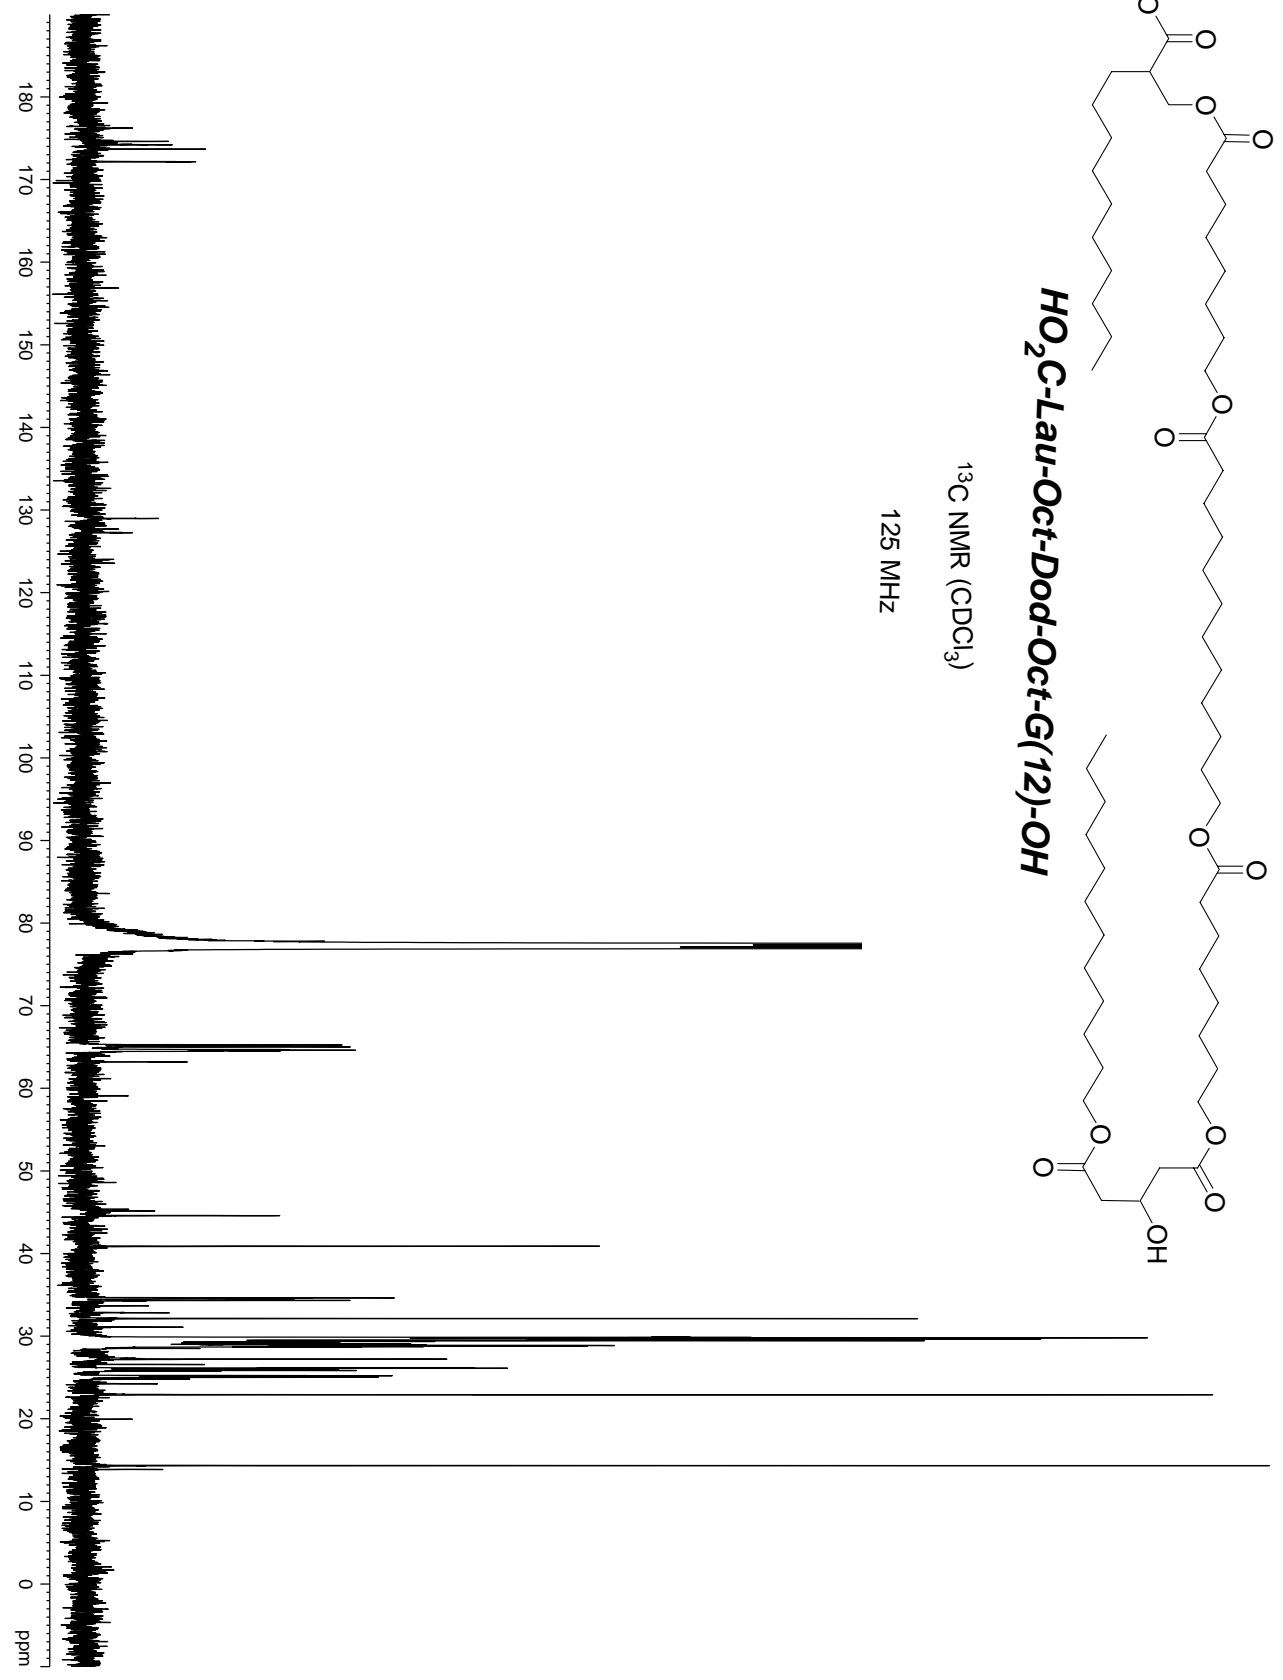

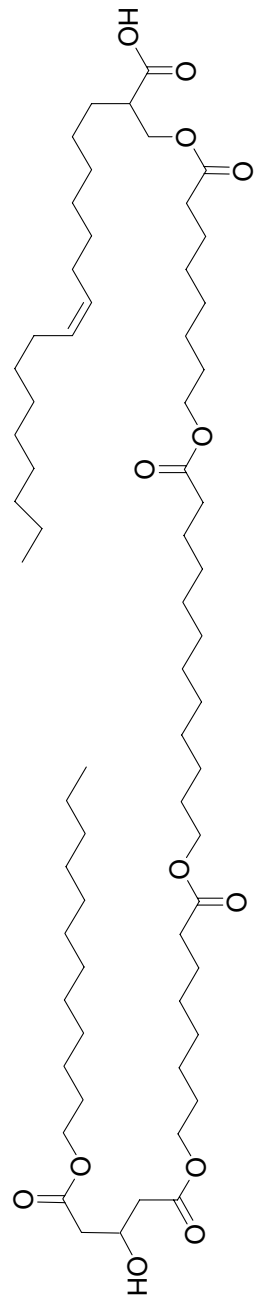

**HO<sub>2</sub>C-Ole-Dod-Oct-G(12)-OH**

<sup>1</sup>H NMR (CDCl<sub>3</sub>)

500 MHz

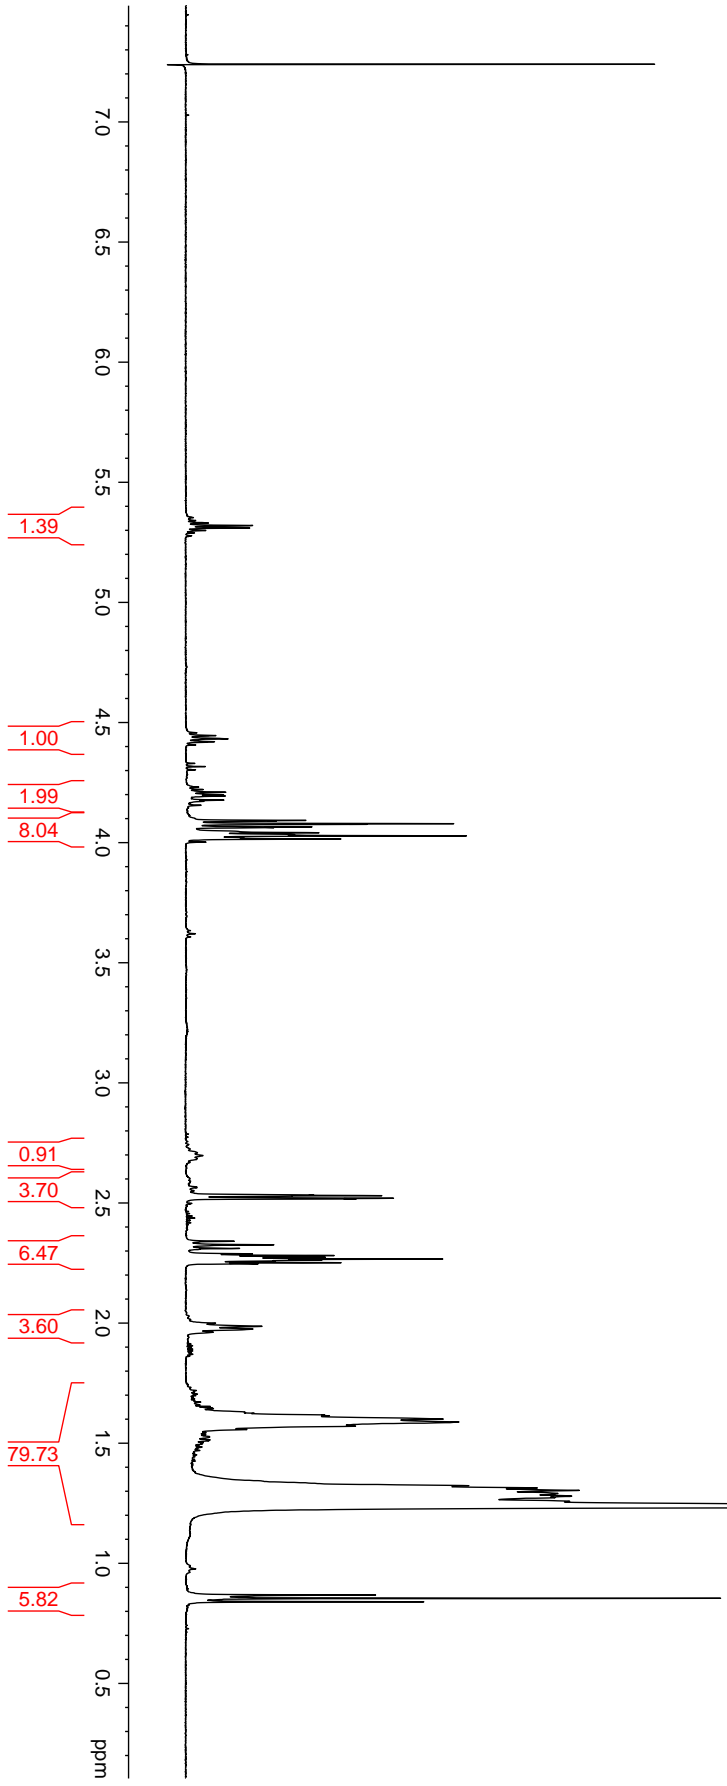

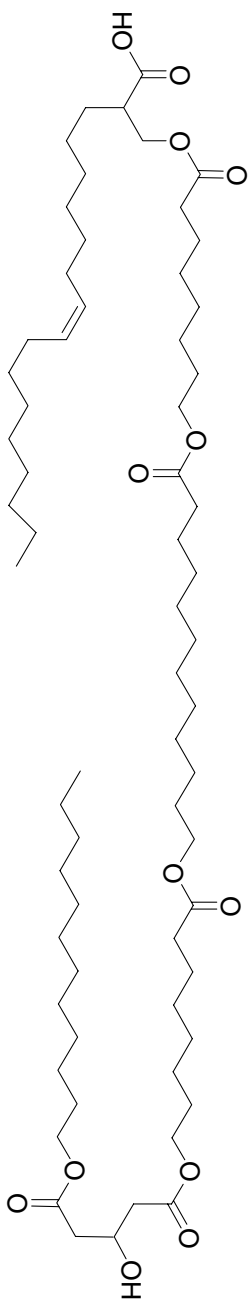

***HO<sub>2</sub>C-Ole-Oct-Dod-Oct-G(12)-OH***

<sup>13</sup>C NMR (CDCl<sub>3</sub>)

125 MHz

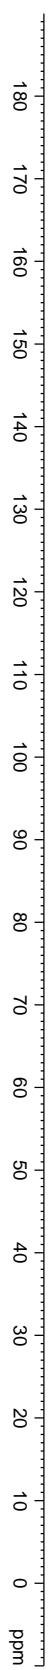

Supplement: b816648j.pdf [file b816648j.pdf]
